# Supplementary material for: Macromolecules Absorbed from Influenza Infection-Based Sera Modulate the Cellular Uptake of Polymeric Nanoparticles
Source: MDPI journal article supplement (doi:10.3390/biomimetics7040219), 2022-11-30
Supplement: s1 [file s1]

# Macromolecules absorbed from influenza infection-based sera modulate the cellular uptake of polymeric nanoparticles

*Daniel Nierenberg<sup>1</sup>, Orielyz Flores<sup>1</sup>, David Fox<sup>2,3</sup>, Yuen Yee Li Sip<sup>2,4</sup>, Caroline Finn<sup>1</sup>, Heba Ghozlan<sup>1</sup>, Amanda Cox<sup>1</sup>, Melanie Coathup<sup>5</sup>, K. Kai McKinstry<sup>1</sup>, Lei Zhai<sup>2,3,4</sup>, and Annette R Khaled<sup>\*1</sup>*

<sup>1</sup>Burnett School of Biomedical Sciences, College of Medicine, University of Central Florida, Orlando, FL, USA; <sup>2</sup>Nanotechnology Science Center, University of Central Florida, Orlando, FL, USA; <sup>3</sup>Department of Chemistry, College of Science, University of Central Florida, Orlando, FL, USA; <sup>4</sup>Department of Materials Science and Engineering, College of Engineering and Computer Science, University of Central Florida, Orlando, FL, USA; <sup>5</sup>Biionix Cluster and Department of Medicine, College of Medicine, University of Central Florida, Orlando, FL, USA

\*Corresponding author

Corresponding author email address: [Annette.Khaled@ucf.edu](mailto:Annette.Khaled@ucf.edu)

Content:

Total number of pages: 8

Total number of figures: 6

## SUPPORTING INFORMATION

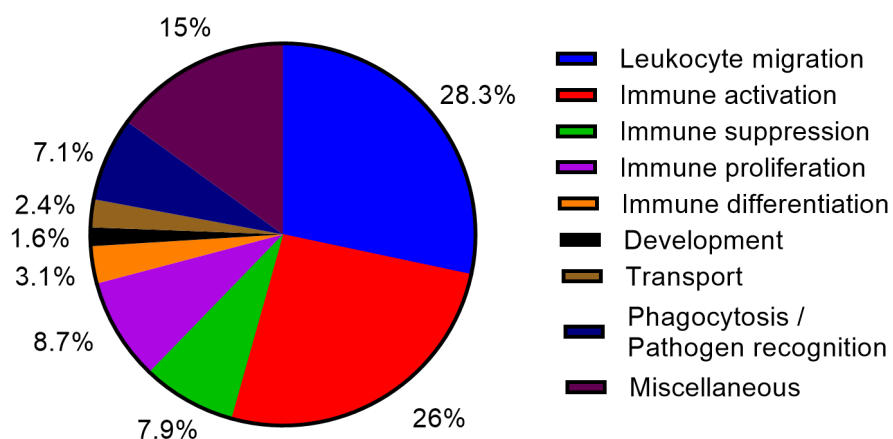

**Figure S1.** Immune-related sheddome

Known or predicted shed proteins related to the immune system, organized by category. Frequency of proteins ( $n = 127$ ) within each category are represented as a percentage. Proteins were identified through SheddomeDB or DeepSMP (A Deep Learning Model for Predicting the Shedding Events of Membrane Proteins) databases.

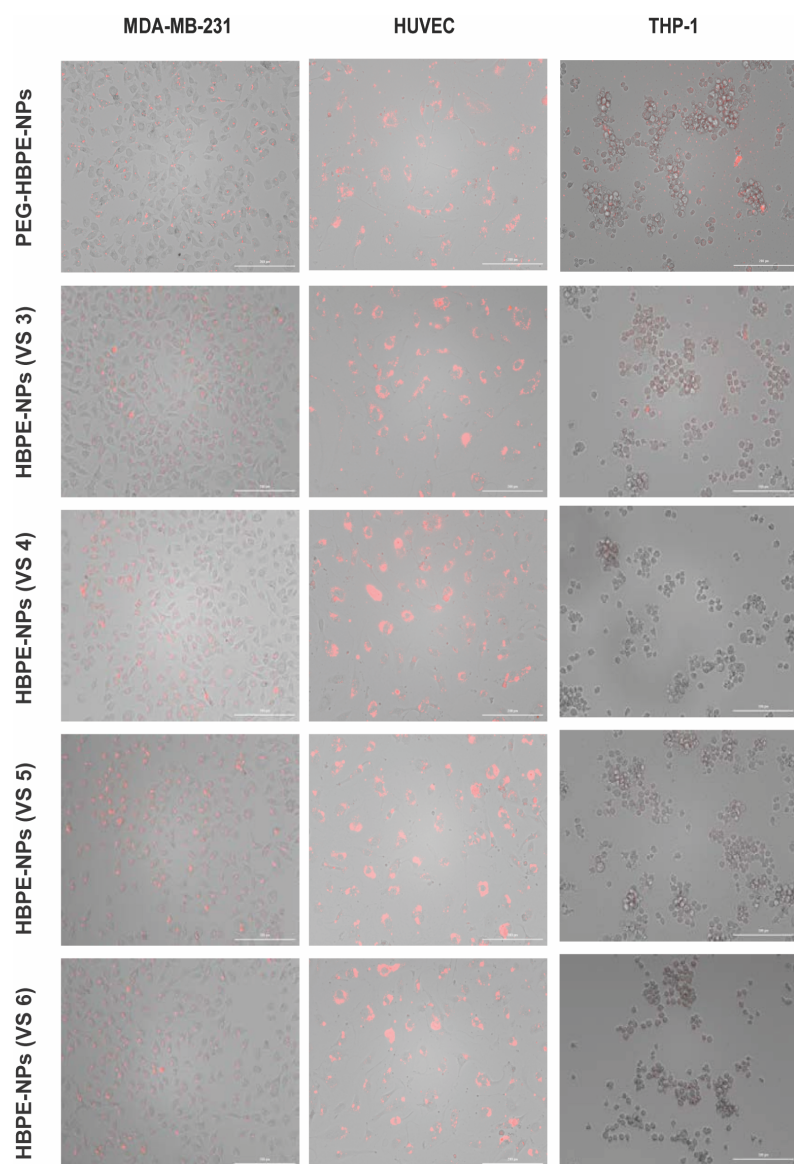

**Figure S2.** HBPE-NPs pre-coated with sera collected from mice infected with IAV display improved cancer cell uptake and reduced monocyte uptake over PEG-HBPE-NPs

Uptake of HBPE-NPs coated with influenza A virus (IAV)-infected mouse sera (days 3 to 6 of infection) was compared to uptake of PEG-HBPE-NPs. Representative Cytoation 5 microscopy images 24 h post-treatment of MDA-MB-231 (left column), HUVEC (middle column), and THP-1 (right column) cells with DiI dye-encapsulated PEG-HBPE-NPs (topmost row), HBPE-

NPs (VS3) (second row), HBPE-NPs (VS4) (third row), HBPE-NPs (VS5) (fourth row), and HBPE-NPs (VS6) (fifth row). Red fluorescence depicts nanoparticle uptake in cells (DiI dye presence). Scale bar represents 200  $\mu\text{m}$ . Magnification was at 10X.

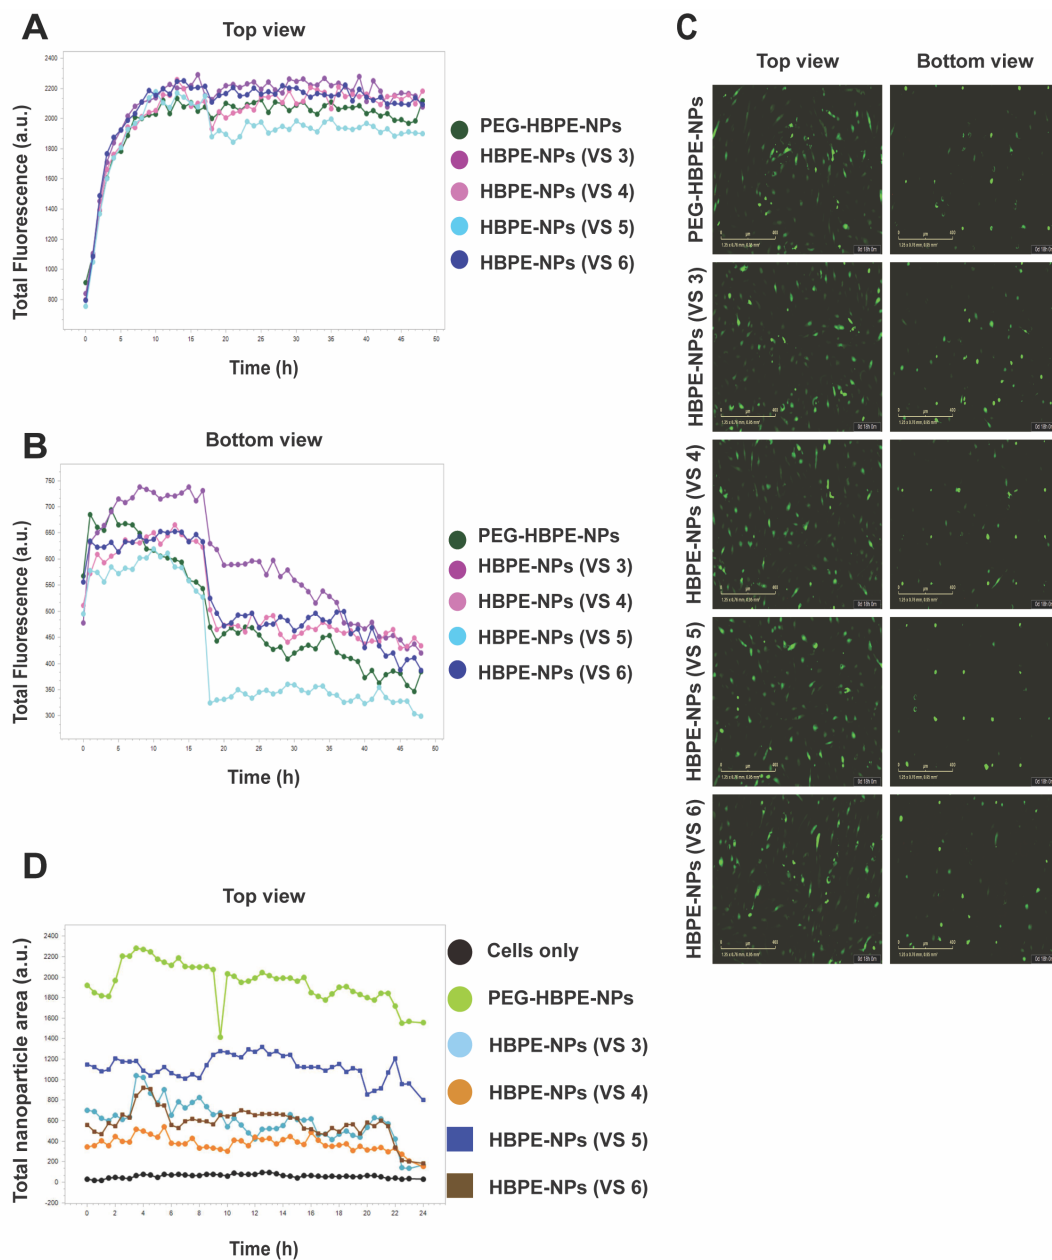



**Figure S3.** HBPE-NPs pre-coated with sera collected from IAV-infected mice do not promote the migration of endothelial cells.

Employing the Incucyte Live-Cell analysis system, HUVEC cells (Cytolight Green) total green fluorescence graphs are shown (A) above or (B) below pore filters for 48 hours (1-hour increments) of treatment with DiI-encapsulated PEG-HBPE-NPs, HBPE- NP (VS3) HBPE-NP (VS3), HBPE-NP (VS4), HBPE-NP (VS5), and HBPE-NP (VS6). (C) Representative HUVEC fluorescent images at 18 hours post-treatment with PEG-HBPE-NPs, HBPE-NPs (VS3), HBPE-NPs (VS4), HBPE-NPs (VS5), and HBPE-NPs (VS6). Magnification was at 10X. (D) Incucyte Live-Cell analysis system was used to quantify total red fluorescence count signal of DiI-loaded PEG-HBPE-NPs, HBPE-NPs (VS3), HBPE-NPs (VS4), HBPE-NPs (VS5), HBPE-NPs (VS6) after 24 hours (30 min increments) of treatment with GFP-HUVEC cells. Data represents mean total RFP (HBPE-NPs) or GFP (HUVECs) count per well.

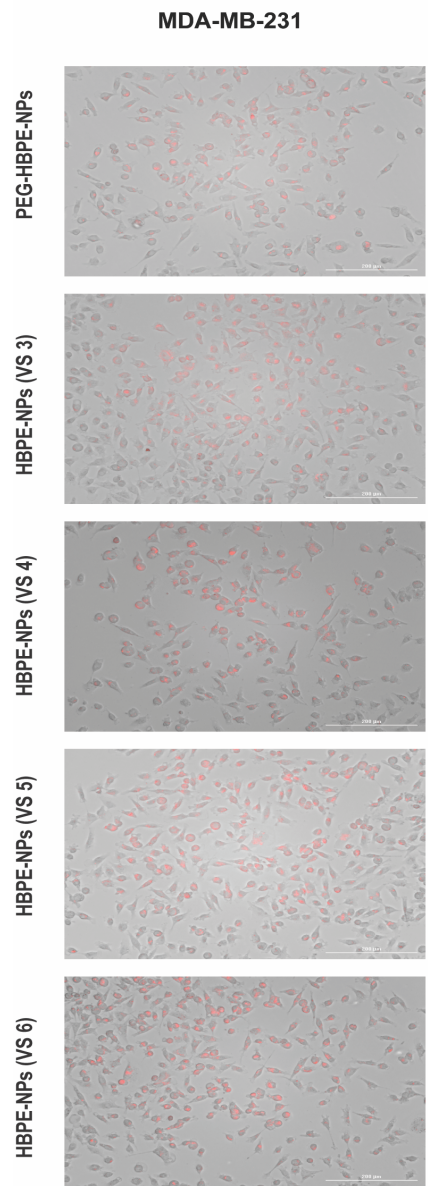

**Figure S4.** HBPE-NPs pre-coated with sera collected from IAV-infected mice reveal improved migration and cancer cell uptake

Uptake of HBPE-NPs that were coated with sera from influenza A virus (IAV)-infected mouse sera (days 3 to 6 of infection) was compared to PEG-HBPE-NPs. Representative Cytation 5 microscopy images were taken 24 hour post-treatment of HUVECs (top chamber) with DiI dye-encapsulated HBPE-NPs and uptake visualized by imaging MDA-MB-231 cells (bottom

chamber). Panels are PEG-HBPE-NPs (topmost panel), HBPE-NPs (VS3) (second panel), HBPE-NPs (VS4) (third panel), HBPE-NPs (VS5) (fourth panel), and HBPE-NPs (VS6) (fifth panel). Red fluorescence depicts nanoparticle uptake in cells (DiI dye presence). Scale bar represents 200  $\mu$ m. Magnification was at 10X.

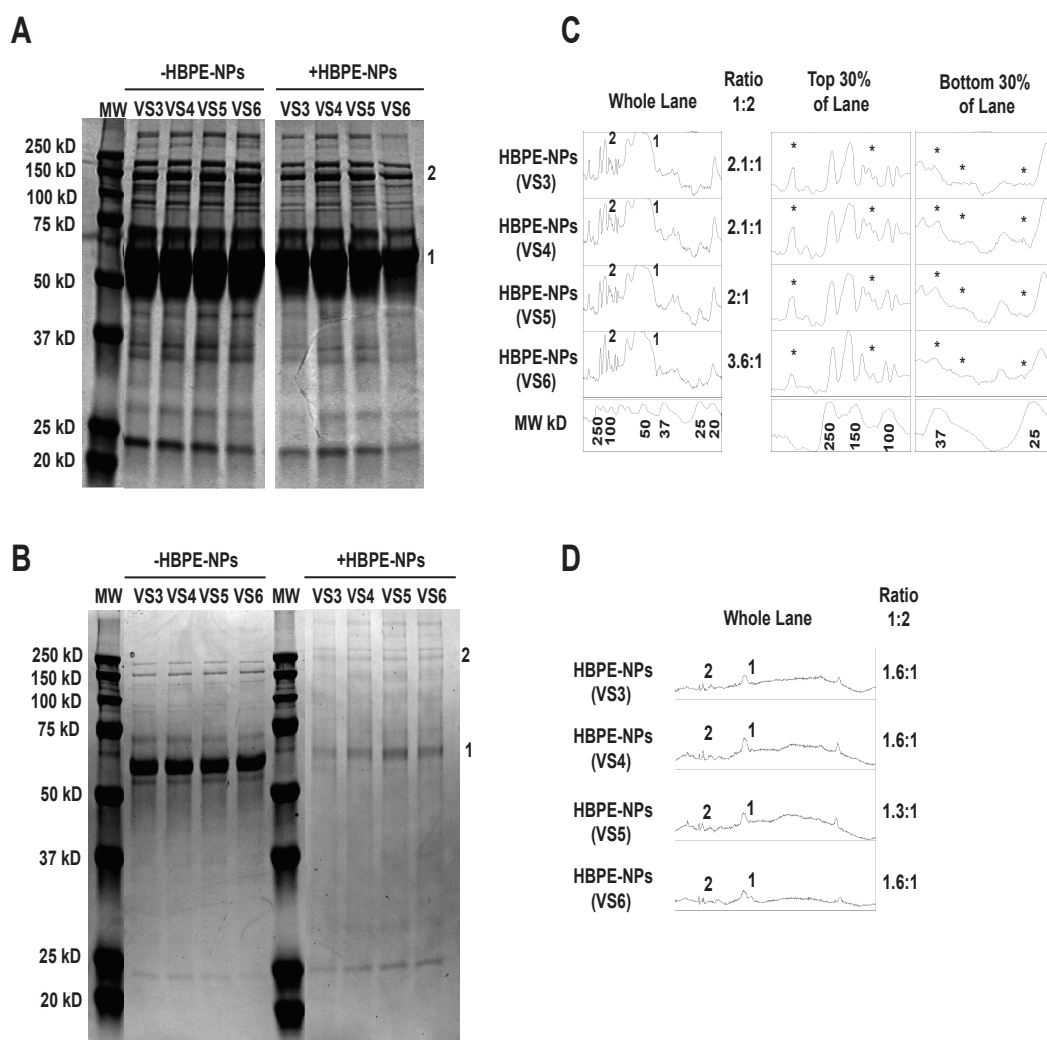

**Figure S5.** Unique profiles result from proteins absorbed by HBPE-NPs pre-treated with sera collected from mice at different stages of the IAV infection.

Proteins in VS3-6 without NPs (-HBPE-NPs) and proteins absorbed by HBPE-NPs treated with VS3-6 (+HBPE-NPs) were assessed by SDS-PAGE and visualized by Coomassie staining. HBPE-NPs were treated with 80  $\mu$ g VS3-6 (A, C) or 20  $\mu$ g VS3-6 (B, D). A Precision-Plus Protein Dual Color protein reference ladder was used for MW comparison. Histograms of individual lane patterns are shown for the whole lane, the upper third of lane, or the lower third of a lane for 80  $\mu$ g sera (C) and 20  $\mu$ g sera (D). Two peaks (1, 2) were selected for quantitation, and ratios of peaks 1 to 2 are shown. Histograms were created and quantified using ImageJ gel analysis software.

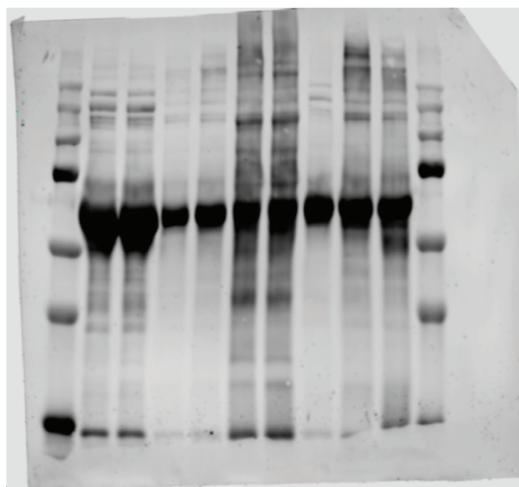

**Figure S6. Raw data blot for Figure 6.**

# List of mass spectrometry data containing identified coronal proteins on HBPE-NPs

## Abbreviations:

|              |                                                                                                                                            |
|--------------|--------------------------------------------------------------------------------------------------------------------------------------------|
| IAV          | Influenza A virus                                                                                                                          |
| HBPE-NP      | Carboxylated-Hyperbranched polyester-nanoparticle                                                                                          |
| V3 (w)       | Quantitative Value (Normalized Total Spectra) of whole IAV-infected sera 3 days post-infection                                             |
| V5 (w)       | Quantitative Value (Normalized Total Spectra) of whole IAV-infected sera 5 days post-infection                                             |
| V3 (c)       | Quantitative Value (Normalized Total Spectra) of IAV-infected sera 3 days post-infection processed the same as V3 + HBPE-NP                |
| V5 (c)       | Quantitative Value (Normalized Total Spectra) of IAV-infected sera 5 days post-infection processed the same as V5 + HBPE-NP                |
| V3 + HBPE-NP | Quantitative Value (Normalized Total Spectra) of COOH-HBPE-NP protein corona after incubation with IAV-infected sera 3 days post-infection |
| V5 + HBPE-NP | Quantitative Value (Normalized Total Spectra) of COOH-HBPE-NP protein corona after incubation with IAV-infected sera 5 days post-infection |

Proteins listed by descending order of Quantitative Value (Normalized Total Spectra) for V5 + NP

| Protein name                                                           | Accession Number      | Molecular Weight | V3 (w)  | V5 (w) | V3 (c) | V5 (c) | V3 + HBPE-NP | V5 + HBPE-NP |
|------------------------------------------------------------------------|-----------------------|------------------|---------|--------|--------|--------|--------------|--------------|
| Albumin                                                                | ALBU_MOUSE            | 69 kDa           | 971.26  | 828.18 | 619.34 | 541.9  | 455.45       | 530.96       |
| Cluster of Pregnancy zone protein                                      | P2P_MOUSE [2]         | 166 kDa          | 146.13  | 152.88 | 104.36 | 76.489 | 139.9        | 219.86       |
| Pregnancy zone protein                                                 | P2P_MOUSE             | 166 kDa          | 146.13  | 152.88 | 104.36 | 76.489 | 139.9        | 219.86       |
| Cluster of Alpha-1-antitrypsin 1-4                                     | A1AT4_MOUSE [4]       | 46 kDa           | 86.702  | 74.789 | 53.313 | 55.746 | 261.56       | 217.13       |
| Cluster of GLOBIN domain-containing protein                            | A8DUK4_MOUSE [3]      | 16 kDa           | 148.08  | 89.087 | 66.925 | 58.339 | 223.54       | 213.48       |
| GLOBIN domain-containing protein                                       | A8DUK4_MOUSE          | 16 kDa           | 148.08  | 89.087 | 66.925 | 58.339 | 222.78       | 212.56       |
| Complement C3                                                          | CO3_MOUSE             | 186 kDa          | 163.66  | 174.88 | 153.13 | 140.01 | 233.43       | 186.11       |
| Alpha-1-antitrypsin 1-4                                                | A1AT4_MOUSE           | 46 kDa           | 66.244  | 53.892 | 38.567 | 44.078 | 188.57       | 153.27       |
| Alpha-1-antitrypsin 1-1                                                | A1AT1_MOUSE           | 46 kDa           | 48.709  | 40.694 | 32.895 | 31.114 | 187.04       | 149.62       |
| Alpha-1-antitrypsin 1-2                                                | A1AT2_MOUSE           | 46 kDa           | 53.58   | 42.894 | 31.761 | 31.114 | 168.8        | 145.05       |
| Serotransferrin                                                        | TRFE_MOUSE            | 77 kDa           | 312.71  | 238.67 | 198.5  | 160.76 | 133.06       | 122.25       |
| Hemopexin                                                              | HEMO_MOUSE            | 51 kDa           | 103.26  | 104.49 | 61.253 | 80.378 | 103.41       | 113.12       |
| Cluster of Serine protease inhibitor A3K                               | SPA3K_MOUSE [5]       | 47 kDa           | 74.038  | 64.891 | 49.91  | 45.375 | 107.97       | 112.21       |
| Cluster of Murinoglobulin-1                                            | MUG1_MOUSE [3]        | 165 kDa          | 62.348  | 56.092 | 85.074 | 67.414 | 130.02       | 108.56       |
| Murinoglobulin-1                                                       | MUG1_MOUSE            | 165 kDa          | 62.348  | 56.092 | 85.074 | 67.414 | 130.02       | 108.56       |
| Alpha-1-antitrypsin 1-5                                                | A1AT5_MOUSE           | 46 kDa           | 22.406  | 15.398 | 10.209 | 9.0749 | 130.78       | 93.966       |
| Serine protease inhibitor A3K                                          | SPA3K_MOUSE           | 47 kDa           | 60.399  | 53.892 | 36.298 | 37.596 | 79.076       | 82.106       |
| Fibronectin                                                            | FINC_MOUSE            | 273 kDa          | 45.787  | 56.092 | 73.73  | 75.192 | 58.546       | 76.633       |
| Plasminogen                                                            | PLMN_MOUSE            | 91 kDa           | 70.141  | 94.587 | 74.865 | 55.746 | 72.233       | 66.597       |
| Complement C4-B                                                        | COB_MOUSE             | 193 kDa          | 22.406  | 18.697 | 27.224 | 23.336 | 63.108       | 62.036       |
| Inter-alpha-trypsin inhibitor, heavy chain 4                           | ITI4_MOUSE            | 105 kDa          | 30.2    | 45.094 | 89.611 | 89.453 | 79.836       | 61.124       |
| Apolipoprotein A-I                                                     | APOA1_MOUSE           | 31 kDa           | 70.141  | 73.69  | 116.83 | 155.57 | 63.869       | 59.299       |
| Hemoglobin subunit alpha                                               | HBA_MOUSE             | 15 kDa           | 70.141  | 38.495 | 46.507 | 47.967 | 82.877       | 56.562       |
| Apolipoprotein B-100                                                   | APOB_MOUSE            | 509 kDa          | 9.7418  | 20.897 | 6.8059 | 27.225 | 36.496       | 53.825       |
| Hemoglobin subunit beta-2                                              | HBB2_MOUSE            | 16 kDa           | 57.477  | 32.995 | 24.955 | 18.15  | 49.422       | 52.913       |
| Complement factor H                                                    | CFAH_MOUSE            | 139 kDa          | 55.528  | 70.39  | 56.716 | 59.635 | 31.174       | 51.088       |
| Kininogen-1                                                            | KNG1_MOUSE            | 73 kDa           | 54.554  | 50.593 | 89.611 | 82.971 | 54.745       | 49.264       |
| Serine protease inhibitor A3M                                          | SPA3M_MOUSE           | 47 kDa           | 32.148  | 34.095 | 23.821 | 23.336 | 41.059       | 47.439       |
| Vitamin D-binding protein                                              | VTDB_MOUSE            | 54 kDa           | 37.993  | 34.095 | 38.567 | 46.671 | 49.422       | 47.439       |
| Haptoglobin                                                            | HPT_MOUSE             | 39 kDa           | 43.838  | 48.393 | 38.567 | 47.967 | 17.488       | 47.439       |
| Murinoglobulin-2                                                       | MUG2_MOUSE            | 162 kDa          | 37.019  | 29.696 | 46.507 | 40.189 | 50.943       | 39.229       |
| Hemoglobin subunit epsilon-Y2                                          | HBE_MOUSE             | 16 kDa           | 0       | 0      | 0      | 0      | 29.653       | 36.492       |
| Cluster of Carboxylesterase 1C                                         | EST1C_MOUSE [3]       | 61 kDa           | 49.683  | 34.095 | 27.224 | 20.743 | 35.736       | 36.492       |
| Apolipoprotein A-IV                                                    | APOA4_MOUSE           | 45 kDa           | 20.458  | 38.495 | 38.567 | 46.671 | 36.496       | 33.755       |
| Carboxylesterase 1C                                                    | EST1C_MOUSE           | 61 kDa           | 47.735  | 31.896 | 27.224 | 20.743 | 33.455       | 33.755       |
| Serine protease inhibitor A3N                                          | SPA3N_MOUSE           | 47 kDa           | 22.406  | 23.097 | 15.88  | 15.557 | 30.414       | 31.018       |
| Prothrombin                                                            | THRB_MOUSE            | 70 kDa           | 24.355  | 31.896 | 38.567 | 44.078 | 33.455       | 29.193       |
| Phosphatidylinositol-glycan-specific phospholipase D                   | PHLD_MOUSE            | 93 kDa           | 16.561  | 18.697 | 22.686 | 31.114 | 33.455       | 28.281       |
| Inter-alpha-trypsin inhibitor heavy chain H3                           | ITI3_MOUSE            | 99 kDa           | 9.7418  | 19.797 | 20.418 | 23.336 | 25.091       | 26.457       |
| Inter-alpha-trypsin inhibitor heavy chain H1                           | ITI1_MOUSE            | 101 kDa          | 3.8967  | 7.6989 | 6.8059 | 6.4821 | 27.372       | 26.457       |
| HMW kininogen-II                                                       | GQ59I3_MOUSE          | 71 kDa           | 12.664  | 13.198 | 20.418 | 18.15  | 23.571       | 25.544       |
| Thrombospondin-1                                                       | TSP1_MOUSE            | 130 kDa          | 23.38   | 37.395 | 71.462 | 62.228 | 26.612       | 22.807       |
| Inter-alpha-trypsin inhibitor heavy chain H2                           | ITI2_MOUSE            | 106 kDa          | 9.7418  | 18.697 | 21.552 | 24.632 | 28.893       | 22.807       |
| Ceruloplasmin                                                          | CERU_MOUSE            | 121 kDa          | 53.58   | 58.292 | 27.224 | 32.41  | 6.8431       | 21.895       |
| Beta-2-glycoprotein 1                                                  | APOH_MOUSE            | 39 kDa           | 30.2    | 27.496 | 23.821 | 33.707 | 7.6034       | 21.895       |
| Complement factor B                                                    | CFAB_MOUSE            | 85 kDa           | 20.458  | 24.197 | 22.686 | 23.336 | 28.133       | 21.895       |
| Antithrombin-III                                                       | ANT3_MOUSE            | 52 kDa           | 14.613  | 15.398 | 14.746 | 11.668 | 25.091       | 21.895       |
| Inhibitor of carbonic anhydrase                                        | ICA_MOUSE             | 77 kDa           | 19.484  | 25.296 | 11.343 | 10.371 | 24.331       | 19.158       |
| Histidine-rich glycoprotein                                            | HRG_MOUSE             | 59 kDa           | 15.587  | 19.797 | 11.343 | 19.446 | 22.81        | 19.158       |
| Cluster of Actin, cytoplasmic 1                                        | ACTB_MOUSE [5]        | 42 kDa           | 5.8451  | 9.8986 | 14.746 | 10.371 | 18.248       | 19.158       |
| Cluster of IF rod domain-containing protein                            | E9Q0FO_MOUSE [18]     | 112 kDa          | 12.664  | 18.697 | 11.343 | 35.003 | 3.8017       | 18.246       |
| Alpha-2-HS-glycoprotein                                                | FETUA_MOUSE           | 37 kDa           | 43.838  | 38.495 | 81.671 | 75.192 | 31.174       | 17.334       |
| Cluster of H-2 class I histocompatibility antigen, Q10 alpha chain     | HA10_MOUSE [8]        | 37 kDa           | 9.7418  | 9.8986 | 26.089 | 42.782 | 22.05        | 17.334       |
| H-2 class I histocompatibility antigen, Q10 alpha chain                | HA10_MOUSE            | 37 kDa           | 8.7676  | 8.7988 | 23.821 | 38.893 | 19.769       | 17.334       |
| Complement factor I                                                    | CFAI_MOUSE            | 67 kDa           | 11.69   | 14.298 | 18.149 | 23.336 | 17.488       | 17.334       |
| BPI fold-containing family A member 2                                  | BPIA2_MOUSE           | 25 kDa           | 1.9484  | 6.5991 | 9.0745 | 22.039 | 6.0827       | 17.334       |
| Clusterin                                                              | CLUS_MOUSE            | 52 kDa           | 18.509  | 16.498 | 49.91  | 47.967 | 25.091       | 16.421       |
| Gelsolin                                                               | GELS_MOUSE            | 86 kDa           | 12.664  | 18.697 | 35.164 | 33.707 | 32.695       | 16.421       |
| Actin, cytoplasmic 1                                                   | ACTB_MOUSE (+1)       | 42 kDa           | 4.8709  | 9.8986 | 12.477 | 10.371 | 16.728       | 16.421       |
| Carboxylic ester hydrolase                                             | D3Z5G7_MOUSE          | 62 kDa           | 21.432  | 16.498 | 12.477 | 11.668 | 12.926       | 15.509       |
| Vitronectin                                                            | VINC_MOUSE            | 55 kDa           | 7.7935  | 12.098 | 41.97  | 33.707 | 27.372       | 15.509       |
| Plasma kallikrein                                                      | KLKB1_MOUSE           | 71 kDa           | 9.7418  | 8.7988 | 9.0745 | 11.668 | 17.488       | 15.509       |
| Carboxypeptidase N subunit 2                                           | CPN2_MOUSE            | 60 kDa           | 3.8967  | 8.7988 | 9.0745 | 5.1857 | 18.248       | 14.597       |
| Serum paraoxonase/arylesterase 1                                       | PON1_MOUSE            | 40 kDa           | 6.8193  | 12.098 | 9.0745 | 9.0749 | 11.405       | 14.597       |
| Alpha-1B-glycoprotein                                                  | A1B_MOUSE             | 57 kDa           | 2.9225  | 8.7988 | 4.5373 | 11.668 | 9.8845       | 14.597       |
| Immunoglobulin heavy constant mu                                       | IGHM_MOUSE            | 50 kDa           | 24.355  | 29.696 | 19.283 | 19.446 | 6.0827       | 13.684       |
| Zinc-alpha-2-glycoprotein                                              | ZA2_MOUSE             | 35 kDa           | 6.8193  | 7.6989 | 7.9402 | 6.4821 | 12.926       | 13.684       |
| Complement C5                                                          | CO5_MOUSE             | 189 kDa          | 13.639  | 16.498 | 9.0745 | 6.4821 | 20.529       | 12.772       |
| Apolipoprotein E                                                       | APOE_MOUSE            | 36 kDa           | 10.716  | 12.098 | 17.015 | 23.336 | 11.405       | 12.772       |
| Plasma protease C1 inhibitor                                           | IC1_MOUSE             | 56 kDa           | 7.7935  | 7.6989 | 6.8059 | 3.8893 | 15.967       | 12.772       |
| Serine protease inhibitor A3C                                          | SPA3C_MOUSE           | 47 kDa           | 15.587  | 20.897 | 11.343 | 16.853 | 12.926       | 11.86        |
| Serine protease inhibitor A3F                                          | SPA3F_MOUSE           | 50 kDa           | 0       | 0      | 0      | 0      | 0            | 11.86        |
| Alpha-1-acid glycoprotein 1                                            | A1AG1_MOUSE           | 24 kDa           | 4.8709  | 3.2995 | 3.4029 | 1.2964 | 15.207       | 11.86        |
| Fetuin-B                                                               | FETUB_MOUSE           | 43 kDa           | 14.613  | 15.398 | 22.686 | 25.928 | 12.926       | 10.948       |
| Alpha-2-antiplasmin                                                    | A2AP_MOUSE            | 55 kDa           | 7.7935  | 12.098 | 11.343 | 5.1857 | 13.686       | 10.948       |
| Cluster of Glutathione peroxidase 3                                    | GPX3_MOUSE [2]        | 25 kDa           | 8.7676  | 14.298 | 4.5373 | 11.668 | 3.8017       | 10.948       |
| Glutathione peroxidase 3                                               | GPX3_MOUSE            | 25 kDa           | 8.7676  | 14.298 | 4.5373 | 11.668 | 3.8017       | 10.948       |
| Insulin-like growth factor-binding protein complex acid labile subunit | ALS_MOUSE             | 67 kDa           | 1.9484  | 1.0998 | 0      | 0      | 6.0827       | 10.948       |
| Afamin                                                                 | AFAM_MOUSE            | 69 kDa           | 5.8451  | 3.2995 | 5.6716 | 3.8893 | 20.529       | 10.035       |
| Complement component C8 beta chain                                     | CO8B_MOUSE            | 66 kDa           | 5.8451  | 7.6989 | 11.343 | 11.668 | 7.6034       | 10.035       |
| Sulphydryl oxidase 1                                                   | QSXI_MOUSE            | 83 kDa           | 8.7676  | 9.8986 | 4.5373 | 5.1857 | 3.0414       | 10.035       |
| Actin, alpha skeletal muscle                                           | ACTS_MOUSE            | 42 kDa           | 4.8709  | 6.5991 | 10.209 | 7.7785 | 9.8845       | 9.1229       |
| Protein AMBP                                                           | AMBP_MOUSE            | 39 kDa           | 13.639  | 18.697 | 22.686 | 24.632 | 6.8431       | 9.1229       |
| Ig gamma-2B chain C region                                             | IGG2B_MOUSE           | 44 kDa           | 9.7418  | 21.997 | 3.4029 | 23.336 | 0.76034      | 9.1229       |
| Epidermal growth factor receptor                                       | EGFR_MOUSE            | 135 kDa          | 5.8451  | 9.8986 | 11.343 | 10.371 | 10.645       | 9.1229       |
| Complement component C8 alpha chain                                    | CO8A_MOUSE            | 66 kDa           | 2.9225  | 4.3994 | 5.6716 | 7.7785 | 12.165       | 9.1229       |
| Immunoglobulin heavy constant gamma 3                                  | A0A1Y7VIN6_MOUSE (+1) | 44 kDa           | 4.8709  | 4.3994 | 1.1343 | 5.1857 | 0            | 8.2106       |
| Ig gamma-1 chain C region, membrane-bound form                         | IGH1M_MOUSE           | 43 kDa           | 16.561  | 25.296 | 11.343 | 28.521 | 0.76034      | 7.2984       |
| Coagulation factor X                                                   | FA10_MOUSE            | 54 kDa           | 8.7676  | 8.7988 | 11.343 | 12.964 | 7.6034       | 7.2984       |
| LRRC2 domain-containing protein                                        | Q91XL1_MOUSE          | 37 kDa           | 9.7418  | 7.6989 | 6.8059 | 5.1857 | 6.8431       | 7.2984       |
| Serum amyloid A-1 protein                                              | SA1_MOUSE             | 14 kDa           | 9.7418  | 6.5991 | 21.552 | 18.15  | 10.645       | 7.2984       |
| Apolipoprotein C-III                                                   | APOC3_MOUSE           | 11 kDa           | 0       | 0      | 4.5373 | 19.446 | 5.3224       | 7.2984       |
| Complement component C8 gamma chain                                    | CO8G_MOUSE            | 23 kDa           | 0.97418 | 3.2995 | 0      | 0      | 2.281        | 7.2984       |
| Alpha-1-acid glycoprotein 2                                            | A1AG2_MOUSE           | 24 kDa           | 8.7676  | 7.6989 | 5.6716 | 1.2964 | 6.0827       | 7.2984       |

|                                                                          |                       |         |         |        |        |        |         |         |
|--------------------------------------------------------------------------|-----------------------|---------|---------|--------|--------|--------|---------|---------|
| Keratin, type II cytoskeletal 1                                          | K2C1_MOUSE            | 66 kDa  | 3.8967  | 7.6989 | 4.5373 | 12.964 | 1.5207  | 6.3861  |
| Keratin, type II cytoskeletal 1b                                         | K2C1B_MOUSE           | 61 kDa  | 3.8967  | 3.2995 | 2.2686 | 5.1857 | 2.281   | 6.3861  |
| Immunoglobulin kappa constant                                            | IGKC_MOUSE            | 12 kDa  | 9.7418  | 18.697 | 12.477 | 23.336 | 2.281   | 6.3861  |
| Apolipoprotein A-II                                                      | APOA2_MOUSE           | 11 kDa  | 5.8451  | 4.3994 | 5.6716 | 7.7785 | 15.207  | 6.3861  |
| Corticosteroid-binding globulin                                          | CBG_MOUSE             | 45 kDa  | 5.8451  | 5.4992 | 5.6716 | 1.2964 | 8.3638  | 6.3861  |
| Complement factor D                                                      | CFAD_MOUSE            | 28 kDa  | 2.9225  | 3.2995 | 5.6716 | 3.8893 | 8.3638  | 6.3861  |
| Phosphatidylcholine-sterol acyltransferase                               | LCAT_MOUSE            | 50 kDa  | 0.97418 | 0      | 1.1343 | 1.2964 | 6.0827  | 6.3861  |
| C4b-binding protein                                                      | C4BPA_MOUSE           | 52 kDa  | 2.9225  | 4.3994 | 4.5373 | 6.4821 | 5.3224  | 5.4738  |
| Coagulation factor XII                                                   | FA12_MOUSE            | 66 kDa  | 0.97418 | 2.1997 | 3.4029 | 3.8893 | 8.3638  | 5.4738  |
| Protein Z-dependent protease inhibitor                                   | ZPI_MOUSE             | 52 kDa  | 0.97418 | 1.0998 | 1.1343 | 0      | 3.8017  | 5.4738  |
| Retinol-binding protein 4                                                | RET4_MOUSE            | 23 kDa  | 0       | 0      | 2.2686 | 1.2964 | 3.8017  | 5.4738  |
| Ig-like domain-containing protein                                        | Q8HWB2_MOUSE          | 40 kDa  | 2.9225  | 4.3994 | 9.0745 | 16.853 | 6.0827  | 4.5615  |
| H-2 class I histocompatibility antigen, Q8 alpha chain                   | HA18_MOUSE            | 37 kDa  | 1.9484  | 2.1997 | 0      | 5.1857 | 0       | 4.5615  |
| Ig-like domain-containing protein                                        | G3UXE9_MOUSE          | 45 kDa  | 0       | 0      | 0      | 0      | 0       | 4.5615  |
| Beta-actin-like protein 2                                                | ACTBL_MOUSE           | 42 kDa  | 2.9225  | 3.2995 | 7.9402 | 3.8893 | 3.0414  | 4.5615  |
| Cluster of Keratin, type I cytoskeletal 10                               | K1C10_MOUSE [9]       | 58 kDa  | 5.8451  | 14.298 | 6.8059 | 25.928 | 0       | 4.5615  |
| Complement component C9                                                  | CO9_MOUSE             | 62 kDa  | 4.8709  | 1.0998 | 5.6716 | 1.2964 | 10.645  | 4.5615  |
| Vitamin K-dependent protein Z                                            | PROZ_MOUSE            | 44 kDa  | 3.8967  | 4.3994 | 5.6716 | 5.1857 | 3.8017  | 4.5615  |
| Ig-like domain-containing protein                                        | A0A075B5M7_MOUSE      | 10 kDa  | 4.8709  | 8.7988 | 2.2686 | 6.4821 | 0       | 4.5615  |
| IF rod domain-containing protein                                         | E9Q0F0_MOUSE          | 112 kDa | 3.8967  | 4.3994 | 3.4029 | 6.4821 | 0.76034 | 3.6492  |
| Keratin, type II cytoskeletal 73                                         | K2C73_MOUSE           | 59 kDa  | 2.9225  | 2.1997 | 2.2686 | 5.1857 | 1.5207  | 3.6492  |
| Keratin, type II cytoskeletal 74                                         | K2C74_MOUSE           | 55 kDa  | 2.9225  | 0      | 0      | 0      | 1.5207  | 3.6492  |
| Beta-2-microglobulin                                                     | B2MG_MOUSE            | 14 kDa  | 2.9225  | 2.1997 | 13.612 | 12.964 | 2.281   | 3.6492  |
| Serum amyloid A-4 protein                                                | SAA4_MOUSE            | 15 kDa  | 2.9225  | 2.1997 | 4.5373 | 3.8893 | 9.1241  | 3.6492  |
| Cluster of Talin-1                                                       | TLN1_MOUSE [2]        | 270 kDa | 0       | 0      | 7.9402 | 6.4821 | 3.0414  | 3.6492  |
| Talin-1                                                                  | TLN1_MOUSE            | 270 kDa | 0       | 0      | 7.9402 | 6.4821 | 3.0414  | 3.6492  |
| Lumican                                                                  | LUM_MOUSE             | 38 kDa  | 1.9484  | 4.3994 | 6.8059 | 6.4821 | 3.0414  | 3.6492  |
| Mannose-binding protein C                                                | MBL2_MOUSE            | 26 kDa  | 0.97418 | 3.2995 | 6.8059 | 6.4821 | 2.281   | 3.6492  |
| Heparin cofactor 2                                                       | HEP2_MOUSE            | 54 kDa  | 1.9484  | 3.2995 | 2.2686 | 2.5928 | 1.5207  | 3.6492  |
| Ras-related protein Rab-21                                               | RAB21_MOUSE           | 24 kDa  | 3.8967  | 4.3994 | 2.2686 | 5.1857 | 3.0414  | 3.6492  |
| Coagulation factor XIII B chain                                          | F13B_MOUSE            | 76 kDa  | 1.9484  | 0      | 4.5373 | 1.2964 | 3.0414  | 3.6492  |
| N-acetylmuramoyl-L-alanine amidase                                       | GRP2_MOUSE            | 58 kDa  | 0.97418 | 4.3994 | 2.2686 | 2.5928 | 4.5621  | 3.6492  |
| Carbonic anhydrase 1                                                     | CAH1_MOUSE            | 28 kDa  | 1.9484  | 1.0998 | 0      | 1.2964 | 4.5621  | 3.6492  |
| Carboxylesterase 1D                                                      | EST1D_MOUSE           | 62 kDa  | 6.8193  | 3.2995 | 3.4029 | 0      | 2.281   | 2.7369  |
| Keratin, type II cytoskeletal 2 epidermal                                | K2E2_MOUSE            | 71 kDa  | 1.9484  | 3.2995 | 0      | 5.1857 | 0       | 2.7369  |
| Keratin, type I cytoskeletal 10                                          | K1C10_MOUSE           | 58 kDa  | 5.8451  | 12.098 | 4.5373 | 10.371 | 0       | 2.7369  |
| Apolipoprotein C-I                                                       | APOC1_MOUSE           | 10 kDa  | 0       | 0      | 11.343 | 11.668 | 2.281   | 2.7369  |
| Talin-2                                                                  | TLN2_MOUSE            | 254 kDa | 0       | 0      | 1.1343 | 0      | 0       | 2.7369  |
| Carboxypeptidase N catalytic chain                                       | CBPN_MOUSE            | 52 kDa  | 4.8709  | 6.5991 | 4.5373 | 3.8893 | 3.8017  | 2.7369  |
| Hepatocyte growth factor activator                                       | HGFA_MOUSE            | 71 kDa  | 4.8709  | 8.7988 | 5.6716 | 6.4821 | 3.0414  | 2.7369  |
| Serum amyloid A-2 protein                                                | SAA2_MOUSE            | 14 kDa  | 4.8709  | 1.0998 | 21.552 | 15.557 | 6.8431  | 2.7369  |
| Serum amyloid P-component                                                | SAMP_MOUSE            | 26 kDa  | 5.8451  | 8.7988 | 4.5373 | 3.8893 | 0.76034 | 2.7369  |
| Carbonic anhydrase 2                                                     | CAH2_MOUSE            | 29 kDa  | 5.8451  | 2.1997 | 1.1343 | 0      | 6.8431  | 2.7369  |
| Coagulation factor V                                                     | FA5_MOUSE             | 247 kDa | 0       | 1.0998 | 6.8059 | 3.8893 | 3.8017  | 2.7369  |
| Cluster of Ig-like domain-containing protein                             | A0A075B5V1_MOUSE [3]  | 11 kDa  | 2.9225  | 7.6989 | 3.4029 | 7.7785 | 0       | 2.7369  |
| Macrophage colony-stimulating factor 1 receptor                          | CSF1R_MOUSE           | 109 kDa | 1.9484  | 3.2995 | 1.1343 | 0      | 4.5621  | 2.7369  |
| Cluster of Complement C1s-A subcomponent                                 | CS1A_MOUSE [2]        | 77 kDa  | 0       | 0      | 0      | 0      | 5.3224  | 2.7369  |
| Complement C1s-A subcomponent                                            | CS1A_MOUSE            | 77 kDa  | 0       | 0      | 0      | 0      | 5.3224  | 2.7369  |
| Complement C1s-B subcomponent                                            | CS1B_MOUSE            | 77 kDa  | 0       | 0      | 0      | 0      | 2.281   | 2.7369  |
| Carboxypeptidase B2                                                      | CPB2_MOUSE            | 49 kDa  | 0       | 0      | 0      | 0      | 2.281   | 2.7369  |
| Ig-like domain-containing protein                                        | A0A0AGYW19_MOUSE      | 13 kDa  | 0       | 2.1997 | 0      | 0      | 0       | 2.7369  |
| Cluster of Tubulin beta-1 chain                                          | TBB1_MOUSE [5]        | 50 kDa  | 0       | 0      | 1.1343 | 0      | 0       | 2.7369  |
| Tubulin beta-1 chain                                                     | TBB1_MOUSE            | 50 kDa  | 0       | 0      | 0      | 0      | 0       | 2.7369  |
| Ig-like domain-containing protein                                        | A0A0G2IE99_MOUSE (+1) | 12 kDa  | 2.9225  | 1.0998 | 1.1343 | 1.2964 | 0       | 2.7369  |
| Ig kappa chain V-V region HP R16.7                                       | KV5AB_MOUSE (+2)      | 12 kDa  | 0       | 0      | 0      | 0      | 0       | 2.7369  |
| Keratin, type II cytoskeletal 5                                          | K2C5_MOUSE            | 62 kDa  | 0.97418 | 2.1997 | 2.2686 | 2.5928 | 0.76034 | 1.8246  |
| Keratin, type II cytoskeletal 2 oral                                     | K2C2O_MOUSE           | 63 kDa  | 0.97418 | 0      | 1.1343 | 3.8893 | 0       | 1.8246  |
| IF rod domain-containing protein                                         | E9Q1Z0_MOUSE          | 58 kDa  | 0       | 0      | 0      | 2.5928 | 0.76034 | 1.8246  |
| Keratin, type II cytoskeletal 79                                         | K2C79_MOUSE           | 58 kDa  | 0       | 0      | 0      | 2.5928 | 0       | 1.8246  |
| Keratin, type I cytoskeletal 42                                          | K1C42_MOUSE           | 50 kDa  | 0       | 2.1997 | 2.2686 | 11.668 | 0       | 1.8246  |
| Keratin, type I cytoskeletal 15                                          | K1C15_MOUSE           | 49 kDa  | 2.9225  | 7.6989 | 2.2686 | 7.7785 | 0       | 1.8246  |
| Keratin, type I cytoskeletal 14                                          | K1C14_MOUSE           | 53 kDa  | 2.9225  | 7.6989 | 2.2686 | 10.371 | 0       | 1.8246  |
| Transthyretin                                                            | THY_MOUSE             | 16 kDa  | 11.69   | 9.8986 | 7.9402 | 7.7785 | 1.5207  | 1.8246  |
| Immunoglobulin heavy constant gamma 2C                                   | FGTQW2_MOUSE          | 44 kDa  | 5.8451  | 12.098 | 1.1343 | 3.8893 | 0       | 1.8246  |
| Golgi autoantigen, golgin subfamily b, macrogolgin 1                     | E9PVZ8_MOUSE          | 370 kDa | 0       | 0      | 0      | 0      | 0.76034 | 1.8246  |
| Cluster of Maltase-glucoamylase                                          | A0A571BF69_MOUSE [2]  | 413 kDa | 1.9484  | 1.0998 | 0      | 0      | 6.0827  | 1.8246  |
| Maltase-glucoamylase                                                     | A0A571BF69_MOUSE      | 413 kDa | 1.9484  | 1.0998 | 0      | 0      | 6.0827  | 1.8246  |
| Peroxisredoxin-2                                                         | PRDX2_MOUSE           | 22 kDa  | 0.97418 | 2.1997 | 4.5373 | 2.5928 | 3.8017  | 1.8246  |
| Platelet-activating factor acetylhydrolase                               | PAFA_MOUSE            | 49 kDa  | 0       | 3.2995 | 6.8059 | 3.8893 | 0.76034 | 1.8246  |
| Ig-like domain-containing protein                                        | A0A075B5V1_MOUSE      | 11 kDa  | 2.9225  | 7.6989 | 3.4029 | 7.7785 | 0       | 1.8246  |
| IgV domain-containing protein                                            | A0A075B5U4_MOUSE      | 11 kDa  | 0       | 1.0998 | 0      | 0      | 0       | 1.8246  |
| Apolipoprotein C-IV                                                      | APOC4_MOUSE           | 14 kDa  | 2.9225  | 1.0998 | 4.5373 | 6.4821 | 3.0414  | 1.8246  |
| Flavin reductase (NADPH)                                                 | BLVRB_MOUSE           | 22 kDa  | 0.97418 | 1.0998 | 1.1343 | 1.2964 | 5.3224  | 1.8246  |
| Adiponectin                                                              | ADIPO_MOUSE           | 27 kDa  | 1.9484  | 3.2995 | 2.2686 | 1.2964 | 0.76034 | 1.8246  |
| Cluster of Ig-like domain-containing protein                             | A0A075B5R5_MOUSE [4]  | 13 kDa  | 2.9225  | 3.2995 | 1.1343 | 3.8893 | 0.76034 | 1.8246  |
| Ig-like domain-containing protein                                        | A0A075B5R5_MOUSE      | 13 kDa  | 2.9225  | 3.2995 | 1.1343 | 3.8893 | 0.76034 | 1.8246  |
| Coagulation factor VII                                                   | FA7_MOUSE             | 50 kDa  | 0       | 1.0998 | 3.4029 | 2.5928 | 1.5207  | 1.8246  |
| Mannan-binding lectin serine protease 1                                  | MASP1_MOUSE           | 80 kDa  | 0       | 2.1997 | 0      | 0      | 2.281   | 1.8246  |
| VWF domain-containing protein                                            | E9Q7P1_MOUSE          | 160 kDa | 0       | 2.1997 | 1.1343 | 1.2964 | 1.5207  | 1.8246  |
| Vitamin K-dependent protein S                                            | PROS_MOUSE            | 75 kDa  | 0       | 0      | 3.4029 | 2.5928 | 2.281   | 1.8246  |
| Ig-like domain-containing protein                                        | A0A140T8M5_MOUSE      | 13 kDa  | 0.97418 | 3.2995 | 0      | 3.8893 | 0       | 1.8246  |
| Tubulin alpha-4A chain                                                   | TBA4A_MOUSE           | 50 kDa  | 0       | 0      | 0      | 0      | 3.8017  | 1.8246  |
| Ig-like domain-containing protein                                        | A0A084I1N0_MOUSE      | 11 kDa  | 0       | 2.1997 | 0      | 0      | 0       | 1.8246  |
| Ig-like domain-containing protein                                        | A0A0AGY7E7_MOUSE      | 13 kDa  | 0       | 0      | 0      | 0      | 0       | 1.8246  |
| Keratin, type I cytoskeletal 16                                          | K1C16_MOUSE           | 52 kDa  | 2.9225  | 6.5991 | 1.1343 | 7.7785 | 0       | 0.91229 |
| Apolipoprotein D                                                         | APOD_MOUSE            | 22 kDa  | 1.9484  | 5.4992 | 15.88  | 28.521 | 1.5207  | 0.91229 |
| THO complex subunit 5 homolog                                            | THOC5_MOUSE           | 79 kDa  | 2.9225  | 1.0998 | 0      | 1.2964 | 0.76034 | 0.91229 |
| Apolipoprotein M                                                         | APOM_MOUSE            | 21 kDa  | 3.8967  | 3.2995 | 3.4029 | 1.2964 | 0.76034 | 0.91229 |
| Nesprin-2                                                                | SYNE2_MOUSE           | 783 kDa | 0       | 0      | 0      | 0      | 0.76034 | 0.91229 |
| Centromere-associated protein E                                          | CENPE_MOUSE           | 287 kDa | 0       | 0      | 0      | 0      | 0       | 0.91229 |
| Apolipoprotein N                                                         | G3X9D6_MOUSE          | 28 kDa  | 1.9484  | 2.1997 | 0      | 0      | 3.0414  | 0.91229 |
| Secreted phosphoprotein 24                                               | SPP24_MOUSE           | 23 kDa  | 1.9484  | 1.0998 | 4.5373 | 7.7785 | 2.281   | 0.91229 |
| Complement C1r-A subcomponent                                            | C1RA_MOUSE            | 80 kDa  | 0.97418 | 2.1997 | 2.2686 | 1.2964 | 2.281   | 0.91229 |
| Ig-like domain-containing protein                                        | A0A075B5V7_MOUSE      | 11 kDa  | 0.97418 | 2.1997 | 1.1343 | 1.2964 | 0       | 0.91229 |
| Phospholipid transfer protein                                            | PLTP_MOUSE            | 54 kDa  | 0       | 0      | 2.2686 | 1.2964 | 2.281   | 0.91229 |
| Interleukin-1 receptor accessory protein                                 | IL1AP_MOUSE           | 66 kDa  | 1.9484  | 3.2995 | 2.2686 | 1.2964 | 1.5207  | 0.91229 |
| HECT and RLD domain-containing E3 ubiquitin protein ligase family member | E9PZP8_MOUSE          | 533 kDa | 0.97418 | 2.1997 | 1.1343 | 2.5928 | 0.76034 | 0.91229 |
| Cluster of Glyceraldehyde-3-phosphate dehydrogenase                      | G3P_MOUSE [2]         | 36 kDa  | 0       | 2.1997 | 4.5373 | 6.4821 | 1.5207  | 0.91229 |
| Glyceraldehyde-3-phosphate dehydrogenase                                 | G3P_MOUSE             | 36 kDa  | 0       | 2.1997 | 4.5373 | 6.4821 | 1.5207  | 0.91229 |
| Vitamin K-dependent protein C                                            | PROC_MOUSE            | 52 kDa  | 0       | 1.0998 | 5.6716 | 5.1857 | 1.5207  | 0.91229 |
| Ig lambda-2 chain C region                                               | LAC2_MOUSE            | 11 kDa  | 1.9484  | 7.6989 | 1.1343 | 6.4821 | 0       | 0.91229 |
| Cluster of Ig-like domain-containing protein                             | A0A075B5T2_MOUSE [3]  | 13 kDa  | 4.8709  | 6.5991 | 3.4029 | 1.2964 | 0       | 0.91229 |
| Ig-like domain-containing protein                                        | A0A075B5T2_MOUSE      | 13 kDa  | 4.8709  | 6.5991 | 3.4029 | 1.2964 | 0       | 0.91229 |
| Complement C2                                                            | CO2_MOUSE             | 85 kDa  | 0       | 1.0998 | 1.1343 | 1.2964 | 3.0414  | 0.91229 |
| Ficolin-1                                                                | FCN1_MOUSE            | 36 kDa  | 1.9484  | 1.0998 | 2.2686 | 1.2964 | 3.0414  | 0.91229 |
| Mannan-binding lectin serine protease 2                                  | MASP2_MOUSE           | 76 kDa  | 0.97418 | 2.1997 | 0      | 0      | 3.0414  | 0.91229 |
| Pigment epithelium-derived factor                                        | PEDF_MOUSE            | 46 kDa  | 2.9225  | 1.0998 | 0      | 0      | 4.5621  | 0.91229 |

|                                                                        |                      |          |         |        |        |        |         |         |
|------------------------------------------------------------------------|----------------------|----------|---------|--------|--------|--------|---------|---------|
| von Willebrand factor                                                  | VWF_MOUSE            | 309 kDa  | 0       | 0      | 2.2686 | 3.8893 | 2.281   | 0.91229 |
| Kinesin family member 13B                                              | A0A286YCV9_MOUSE     | 205 kDa  | 0       | 0      | 0      | 1.2964 | 0       | 0.91229 |
| Anaphylatoxin-like domain-containing protein                           | A2AS37_MOUSE         | 40 kDa   | 0       | 1.0998 | 3.4029 | 3.8893 | 0.76034 | 0.91229 |
| Peptidyl-prolyl cis-trans isomerase A                                  | PPIA_MOUSE           | 18 kDa   | 1.9484  | 3.2995 | 3.4029 | 1.2964 | 0.76034 | 0.91229 |
| Coagulation factor IX                                                  | FA9_MOUSE            | 53 kDa   | 0       | 1.0998 | 2.2686 | 2.5928 | 1.5207  | 0.91229 |
| Complement component 7                                                 | D3YXF5_MOUSE         | 93 kDa   | 0       | 1.0998 | 1.1343 | 1.2964 | 3.0414  | 0.91229 |
| Nestin                                                                 | NEST_MOUSE           | 207 kDa  | 0.97418 | 1.0998 | 1.1343 | 0      | 0       | 0.91229 |
| Tubulin beta-2A chain                                                  | TBB2A_MOUSE(+1)      | 50 kDa   | 0       | 0      | 0      | 0      | 0       | 0.91229 |
| Tubulin beta-4A chain                                                  | TBB4A_MOUSE          | 50 kDa   | 0       | 0      | 0      | 0      | 0       | 0.91229 |
| Tubulin beta-4B chain                                                  | TBB4B_MOUSE          | 50 kDa   | 0       | 0      | 1.1343 | 0      | 0       | 0.91229 |
| Myosin-9                                                               | MYH9_MOUSE           | 226 kDa  | 0       | 0      | 0      | 0      | 0.76034 | 0.91229 |
| Ig-like domain-containing protein                                      | A0A084J1I5_MOUSE     | 13 kDa   | 0.97418 | 2.1997 | 1.1343 | 1.2964 | 0       | 0.91229 |
| FAT atypical cadherin 1                                                | A0A1L1SQU7_MOUSE     | 512 kDa  | 0       | 1.0998 | 0      | 0      | 0       | 0.91229 |
| Heparanase                                                             | HPSE_MOUSE           | 60 kDa   | 0.97418 | 2.1997 | 2.2686 | 1.2964 | 0.76034 | 0.91229 |
| Cluster of 14-3-3 protein zeta/delta                                   | 1433Z_MOUSE[4]       | 28 kDa   | 0       | 0      | 0      | 1.2964 | 0.76034 | 0.91229 |
| 14-3-3 protein zeta/delta                                              | 1433Z_MOUSE          | 28 kDa   | 0       | 0      | 0      | 1.2964 | 0.76034 | 0.91229 |
| Nucleoprotein TPR                                                      | TPR_MOUSE            | 274 kDa  | 0       | 0      | 0      | 0      | 0       | 0.91229 |
| ATP-dependent RNA helicase DHX30                                       | DHX30_MOUSE          | 137 kDa  | 0       | 0      | 0      | 0      | 0       | 0.91229 |
| Nuclear receptor subfamily 1 group D member 2                          | NR1D2_MOUSE          | 64 kDa   | 0.97418 | 1.0998 | 1.1343 | 1.2964 | 0.76034 | 0.91229 |
| Plastin-3                                                              | PLST_MOUSE           | 71 kDa   | 0       | 0      | 0      | 0      | 0       | 0.91229 |
| Ig-like domain-containing protein                                      | A0A084J1J7_MOUSE     | 11 kDa   | 1.9484  | 2.1997 | 1.1343 | 2.5928 | 0       | 0.91229 |
| Fibulin-1                                                              | FBLN1_MOUSE          | 78 kDa   | 0       | 0      | 1.1343 | 1.2964 | 0.76034 | 0.91229 |
| Ig lambda-2 chain V region                                             | LV2A_MOUSE           | 12 kDa   | 0.97418 | 1.0998 | 1.1343 | 1.2964 | 0       | 0.91229 |
| Telomere-associated protein RIF1                                       | RIF1_MOUSE           | 266 kDa  | 0       | 0      | 0      | 0      | 0.76034 | 0.91229 |
| Triosephosphate isomerase                                              | TPIS_MOUSE           | 32 kDa   | 0       | 1.0998 | 0      | 1.2964 | 0.76034 | 0.91229 |
| G_PROTEIN_RECEP_F3_4 domain-containing protein                         | E9Q759_MOUSE         | 96 kDa   | 0       | 0      | 0      | 1.2964 | 0       | 0.91229 |
| Neuron navigator 3                                                     | NAV3_MOUSE           | 252 kDa  | 0       | 0      | 0      | 0      | 0       | 0.91229 |
| RRP12-like protein                                                     | RRP12_MOUSE          | 143 kDa  | 0       | 0      | 1.1343 | 0      | 0       | 0.91229 |
| Sodium/potassium-transporting ATPase subunit alpha-2                   | AT1A2_MOUSE          | 112 kDa  | 0.97418 | 1.0998 | 0      | 0      | 0.76034 | 0.91229 |
| M-phase phosphoprotein 9                                               | MPP9_MOUSE           | 110 kDa  | 0       | 0      | 0      | 0      | 0       | 0.91229 |
| WD repeat-containing protein 1                                         | WDR1_MOUSE           | 66 kDa   | 0       | 0      | 0      | 0      | 0.76034 | 0.91229 |
| Cluster of Rab GDP dissociation inhibitor beta                         | GDIB_MOUSE[2]        | 51 kDa   | 0       | 0      | 0      | 0      | 1.5207  | 0.91229 |
| Rab GDP dissociation inhibitor beta                                    | GDIB_MOUSE           | 51 kDa   | 0       | 0      | 0      | 0      | 1.5207  | 0.91229 |
| Platelet glycoprotein V                                                | GPV_MOUSE            | 63 kDa   | 0       | 0      | 0      | 0      | 0       | 0.91229 |
| Ig-like domain-containing protein                                      | A0A140T8M2_MOUSE     | 13 kDa   | 0.97418 | 2.1997 | 0      | 1.2964 | 0       | 0.91229 |
| Transformation/transcription domain-associated protein                 | TRRAP_MOUSE          | 292 kDa  | 0       | 0      | 0      | 0      | 0       | 0.91229 |
| Biotinidase                                                            | BDT_MOUSE            | 58 kDa   | 0       | 0      | 0      | 0      | 0       | 0.91229 |
| Zinc finger protein 579                                                | ZNF579_MOUSE         | 61 kDa   | 0       | 0      | 0      | 0      | 0.76034 | 0.91229 |
| L-selectin                                                             | LYAM1_MOUSE          | 42 kDa   | 0       | 0      | 0      | 0      | 0.76034 | 0.91229 |
| Proteoglycan 4                                                         | PRG4_MOUSE           | 116 kDa  | 0       | 0      | 1.1343 | 1.2964 | 0.76034 | 0.91229 |
| Kinesin-like protein KIF23                                             | KIF23_MOUSE          | 109 kDa  | 0       | 1.0998 | 0      | 0      | 0.76034 | 0.91229 |
| Arf-GAP with SH3 domain, ANK repeat and PH domain-containing protein 2 | ASAP2_MOUSE          | 107 kDa  | 0       | 0      | 0      | 0      | 0       | 0.91229 |
| Serine protease inhibitor A3B                                          | SPA3B_MOUSE          | 47 kDa   | 0       | 0      | 0      | 0      | 0.76034 | 0.91229 |
| Syncoilin                                                              | SYNCI_MOUSE          | 54 kDa   | 0       | 0      | 0      | 0      | 0       | 0.91229 |
| Cluster of Ig kappa chain V-III region PC 2880/PC 1229                 | KV3A1_MOUSE[3]       | 12 kDa   | 0       | 0      | 0      | 1.2964 | 0       | 0.91229 |
| Ig kappa chain V-III region PC 2880/PC 1229                            | KV3A1_MOUSE(+1)      | 12 kDa   | 0       | 0      | 0      | 1.2964 | 0       | 0.91229 |
| Ig kappa chain V19-17                                                  | KV5A1_MOUSE          | 16 kDa   | 0       | 1.0998 | 1.1343 | 0      | 0       | 0.91229 |
| Ig-like domain-containing protein                                      | A0A075B5R3_MOUSE     | 13 kDa   | 0       | 0      | 0      | 0      | 0.76034 | 0.91229 |
| InaD-like protein                                                      | INADL_MOUSE          | 199 kDa  | 0       | 0      | 0      | 0      | 0       | 0.91229 |
| Ig-like domain-containing protein                                      | A0A075B5N4_MOUSE     | 11 kDa   | 0       | 0      | 0      | 0      | 0       | 0.91229 |
| Acetyl-CoA carboxylase 2                                               | ACACB_MOUSE          | 276 kDa  | 0       | 0      | 1.1343 | 0      | 0       | 0.91229 |
| Ig-like domain-containing protein                                      | A0A075B5N6_MOUSE(+1) | 13 kDa   | 0       | 1.0998 | 0      | 0      | 0       | 0.91229 |
| Ig-like domain-containing protein                                      | A0A075B603_MOUSE(+1) | 12 kDa   | 0       | 0      | 0      | 0      | 0.76034 | 0.91229 |
| Thyroxine-binding globulin                                             | THBG_MOUSE           | 47 kDa   | 0       | 0      | 0      | 0      | 0.76034 | 0.91229 |
| Ig-like domain-containing protein                                      | A0A075B5K8_MOUSE(+2) | 13 kDa   | 0       | 0      | 0      | 0      | 0       | 0.91229 |
| Polyunsaturated fatty acid lipoxigenase ALOX12                         | LOX12_MOUSE          | 75 kDa   | 0       | 0      | 0      | 1.2964 | 0       | 0.91229 |
| G_PROTEIN_RECEP_F1_2 domain-containing protein                         | Q9D3U9_MOUSE         | 35 kDa   | 0       | 0      | 0      | 0      | 0.76034 | 0.91229 |
| Ig-like domain-containing protein                                      | A0A075B5K9_MOUSE     | 12 kDa   | 0       | 0      | 0      | 0      | 0       | 0.91229 |
| Ig-like domain-containing protein                                      | A0A084J1I1_MOUSE     | 13 kDa   | 0       | 0      | 0      | 0      | 0       | 0.91229 |
| Ig kappa chain V-VI region NQ2-6.1                                     | KV6A8_MOUSE          | 12 kDa   | 0       | 0      | 0      | 0      | 0       | 0.91229 |
| Peptidyl-prolyl cis-trans isomerase C                                  | PPIC_MOUSE           | 23 kDa   | 0       | 0      | 0      | 0      | 0       | 0.91229 |
| Ras-related protein Rab-18                                             | RAB18_MOUSE          | 23 kDa   | 0       | 0      | 0      | 0      | 0       | 0.91229 |
| Exosome complex component RRP4                                         | EXOS2_MOUSE          | 33 kDa   | 0       | 0      | 0      | 0      | 0       | 0.91229 |
| Activating signal cointegrator 1 complex subunit 2                     | ASCC2_MOUSE          | 86 kDa   | 0       | 0      | 0      | 0      | 0       | 0.91229 |
| Alpha-2-macroglobulin-P                                                | A2MG_MOUSE           | 164 kDa  | 0       | 0      | 0      | 0      | 0       | 0       |
| Predicted gene 7298                                                    | A0A0N4SVU1_MOUSE     | 165 kDa  | 0       | 0      | 0      | 0      | 0       | 0       |
| Ig-like domain-containing protein                                      | Q4KN81_MOUSE         | 40 kDa   | 1.9484  | 0      | 5.6716 | 7.7785 | 0       | 0       |
| Ig-like domain-containing protein                                      | O19441_MOUSE         | 41 kDa   | 2.9225  | 0      | 0      | 0      | 0       | 0       |
| H-2 class I histocompatibility antigen, Q7 alpha chain                 | HA17_MOUSE           | 38 kDa   | 0       | 0      | 0      | 5.1857 | 0       | 0       |
| H-2 class I histocompatibility antigen, D-37 alpha chain               | HA15_MOUSE           | 41 kDa   | 0       | 0      | 0      | 0      | 0       | 0       |
| Keratin, type II cytoskeletal 6A                                       | K2C6A_MOUSE          | 59 kDa   | 0       | 0      | 0      | 2.5928 | 0       | 0       |
| IF rod domain-containing protein                                       | A0A2R8VHP3_MOUSE     | 58 kDa   | 0       | 0      | 0      | 0      | 0       | 0       |
| Keratin, type II cytoskeletal 75                                       | K2C75_MOUSE          | 60 kDa   | 0       | 0      | 0      | 2.5928 | 0       | 0       |
| Keratin, type II cytoskeletal 72                                       | K2C72_MOUSE          | 57 kDa   | 0       | 0      | 0      | 0      | 0       | 0       |
| IF rod domain-containing protein                                       | Q6IFZ8_MOUSE         | 60 kDa   | 0       | 0      | 0      | 0      | 0       | 0       |
| Keratin, type II cuticular Hb4                                         | KRT84_MOUSE          | 65 kDa   | 0       | 0      | 0      | 0      | 0       | 0       |
| Keratin, type II cytoskeletal 4                                        | K2C4_MOUSE           | 56 kDa   | 0       | 0      | 0      | 0      | 0       | 0       |
| Keratin, type II cytoskeletal 6B                                       | K2C6B_MOUSE          | 60 kDa   | 0       | 0      | 0      | 0      | 0       | 0       |
| Predicted gene 17087                                                   | V9GXQ2_MOUSE         | 18 kDa   | 0       | 0      | 0      | 0      | 0       | 0       |
| Keratin, type I cytoskeletal 13                                        | K1C13_MOUSE          | 48 kDa   | 0.97418 | 2.1997 | 1.1343 | 1.2964 | 0       | 0       |
| Keratin, type I cytoskeletal 19                                        | K1C19_MOUSE          | 45 kDa   | 0       | 1.0998 | 1.1343 | 2.5928 | 0       | 0       |
| Keratin, type I cytoskeletal 27                                        | K1C27_MOUSE          | 49 kDa   | 0       | 0      | 0      | 0      | 0       | 0       |
| Keratin, type I cytoskeletal 25                                        | K1C25_MOUSE          | 49 kDa   | 0       | 0      | 0      | 0      | 0       | 0       |
| Epididymal secretory glutathione peroxidase                            | GPX5_MOUSE           | 25 kDa   | 0       | 0      | 0      | 2.5928 | 0       | 0       |
| Predicted gene 8251                                                    | A0A5718EV2_MOUSE     | 747 kDa  | 0       | 1.0998 | 2.2686 | 0      | 1.5207  | 0       |
| Titin                                                                  | TITIN_MOUSE          | 3906 kDa | 0       | 1.0998 | 0      | 0      | 0       | 0       |
| Transcriptional regulator ATRX                                         | ATRX_MOUSE           | 279 kDa  | 0.97418 | 0      | 0      | 0      | 0       | 0       |
| Fibrinogen alpha chain                                                 | FIBA_MOUSE           | 87 kDa   | 1.9484  | 1.0998 | 7.9402 | 15.557 | 0       | 0       |
| Properdin                                                              | PROP_MOUSE           | 50 kDa   | 5.8451  | 6.5991 | 6.8059 | 7.7785 | 0       | 0       |
| CD5 antigen-like                                                       | CD5L_MOUSE           | 39 kDa   | 5.8451  | 6.5991 | 6.8059 | 7.7785 | 0       | 0       |
| Maltase-glucoamylase 2, pseudogene                                     | A0A5718D5S_MOUSE     | 264 kDa  | 0       | 0      | 0      | 0      | 0.76034 | 0       |
| Cluster of Spectrin beta chain, erythrocytic                           | SPTB1_MOUSE[2]       | 245 kDa  | 0       | 0      | 11.343 | 5.1857 | 0       | 0       |
| Spectrin beta chain, erythrocytic                                      | SPTB1_MOUSE          | 245 kDa  | 0       | 0      | 11.343 | 5.1857 | 0       | 0       |
| Spectrin beta chain, non-erythrocytic 1                                | SPTB2_MOUSE          | 274 kDa  | 0       | 0      | 2.2686 | 0      | 0       | 0       |
| Spectrin alpha chain, erythrocytic 1                                   | SPTA1_MOUSE          | 280 kDa  | 0       | 0      | 21.552 | 9.0749 | 0       | 0       |
| PAX3- and PAX7-binding protein 1                                       | PAXB1_MOUSE          | 105 kDa  | 5.8451  | 1.0998 | 1.1343 | 1.2964 | 0.76034 | 0       |
| Olfactory receptor                                                     | Q8VFB1_MOUSE         | 35 kDa   | 0       | 0      | 3.4029 | 3.8893 | 0       | 0       |
| Leukemia inhibitory factor receptor                                    | LIFR_MOUSE           | 123 kDa  | 2.9225  | 1.0998 | 2.2686 | 0      | 6.0827  | 0       |
| Band 3 anion transport protein                                         | B3AT_MOUSE           | 103 kDa  | 0       | 0      | 20.418 | 2.5928 | 0.76034 | 0       |
| Ankyrin-1                                                              | ANK1_MOUSE           | 204 kDa  | 0       | 0      | 15.88  | 6.4821 | 0       | 0       |
| Immunoglobulin heavy constant alpha                                    | A0A0AGYXW6_MOUSE     | 42 kDa   | 4.8709  | 4.3994 | 4.5373 | 2.5928 | 1.5207  | 0       |
| Predicted gene 4788                                                    | E9Q8B5_MOUSE         | 99 kDa   | 1.9484  | 3.2995 | 7.9402 | 5.1857 | 2.281   | 0       |
| SCY domain-containing protein                                          | Q9EQI5_MOUSE         | 12 kDa   | 4.8709  | 6.5991 | 3.4029 | 7.7785 | 0       | 0       |
| Dynein heavy chain 2, axonemal                                         | DYH2_MOUSE           | 512 kDa  | 0       | 0      | 1.1343 | 0      | 0       | 0       |
| Immunoglobulin J chain                                                 | IGJ_MOUSE            | 18 kDa   | 2.9225  | 4.3994 | 7.9402 | 6.4821 | 0       | 0       |
| Filamin-A                                                              | FLNA_MOUSE           | 281 kDa  | 0       | 2.1997 | 3.4029 | 6.4821 | 0.76034 | 0       |
| Selenoprotein P                                                        | SEPP1_MOUSE          | 43 kDa   | 1.9484  | 1.0998 | 0      | 0      | 3.0414  | 0       |

|                                                                     |                       |          |         |        |        |        |         |   |
|---------------------------------------------------------------------|-----------------------|----------|---------|--------|--------|--------|---------|---|
| Cluster of Heat shock cognate 71 kDa protein                        | HSP7C_MOUSE [2]       | 71 kDa   | 0       | 1.0998 | 5.6716 | 3.8893 | 2.281   | 0 |
| Heat shock cognate 71 kDa protein                                   | HSP7C_MOUSE           | 71 kDa   | 0       | 1.0998 | 5.6716 | 3.8893 | 2.281   | 0 |
| Heat shock-related 70 kDa protein 2                                 | HSP72_MOUSE           | 70 kDa   | 0       | 0      | 3.4029 | 0      | 0       | 0 |
| Fibrinogen beta chain                                               | FIBB_MOUSE            | 55 kDa   | 0       | 0      | 5.6716 | 6.4821 | 0       | 0 |
| Gp_dh_C domain-containing protein                                   | V9GXA7_MOUSE          | 13 kDa   | 0       | 0      | 0      | 0      | 0       | 0 |
| Fibrinogen gamma chain                                              | FIBG_MOUSE            | 49 kDa   | 0       | 0      | 6.8059 | 12.964 | 0.76034 | 0 |
| BRCA1-A complex subunit RAP80                                       | UIMC1_MOUSE           | 81 kDa   | 1.9484  | 2.1997 | 0      | 0      | 0       | 0 |
| Nucleotide exchange factor SIL1                                     | SIL1_MOUSE            | 52 kDa   | 0       | 0      | 1.1343 | 0      | 0.76034 | 0 |
| Alpha-synuclein                                                     | SYUA_MOUSE            | 14 kDa   | 0       | 0      | 10.209 | 6.4821 | 0       | 0 |
| Lipocln_cytosolic_FA-bd_dom domain-containing protein               | A2BIN1_MOUSE (+1)     | 21 kDa   | 3.8967  | 2.1997 | 2.2686 | 0      | 0       | 0 |
| Ig-like domain-containing protein                                   | A0A075B5P7_MOUSE      | 13 kDa   | 0       | 0      | 0      | 0      | 0       | 0 |
| Ig heavy chain V region X24                                         | HVM39_MOUSE           | 13 kDa   | 0       | 0      | 0      | 0      | 0       | 0 |
| Ig heavy chain V region RF                                          | HVM53_MOUSE           | 13 kDa   | 0       | 0      | 0      | 0      | 0       | 0 |
| Nesprin-1                                                           | SYNE1_MOUSE           | 1010 kDa | 0       | 0      | 1.1343 | 0      | 0       | 0 |
| Adenomatous polyposis coli protein                                  | APC_MOUSE             | 311 kDa  | 0.97418 | 0      | 1.1343 | 0      | 0       | 0 |
| Lutropin-choriogonadotropic hormone receptor                        | LSHR_MOUSE            | 78 kDa   | 0       | 1.0998 | 2.2686 | 1.2964 | 0       | 0 |
| Ig-like domain-containing protein                                   | A0A075B5T3_MOUSE (+1) | 13 kDa   | 0       | 0      | 0      | 0      | 0       | 0 |
| Phosphatidate phosphatase LPIN1                                     | LPIN1_MOUSE           | 102 kDa  | 0       | 0      | 1.1343 | 2.5928 | 0       | 0 |
| Platelet glycoprotein Ib alpha chain                                | GP1BA_MOUSE           | 80 kDa   | 0.97418 | 2.1997 | 0      | 0      | 1.5207  | 0 |
| Platelet factor 4                                                   | PLF4_MOUSE            | 11 kDa   | 0.97418 | 1.0998 | 1.1343 | 0      | 0       | 0 |
| Dual specificity phosphatase DUPD1                                  | DUPD1_MOUSE           | 24 kDa   | 4.8709  | 0      | 1.1343 | 0      | 0       | 0 |
| Progranulin                                                         | GRN_MOUSE             | 63 kDa   | 2.9225  | 2.1997 | 3.4029 | 2.5928 | 0       | 0 |
| Protein Daple                                                       | DAPLE_MOUSE           | 227 kDa  | 1.9484  | 0      | 1.1343 | 1.2964 | 0       | 0 |
| Prolactin-2B1                                                       | PR2B1_MOUSE           | 26 kDa   | 0       | 1.0998 | 0      | 0      | 0       | 0 |
| Angiotensinogen                                                     | ANGT_MOUSE            | 52 kDa   | 1.9484  | 1.0998 | 0      | 1.2964 | 0.76034 | 0 |
| Microtubule-associated serine/threonine-protein kinase 4            | MAST4_MOUSE           | 284 kDa  | 0       | 2.1997 | 1.1343 | 0      | 0       | 0 |
| Hyaluronan-binding protein 2                                        | HABP2_MOUSE           | 62 kDa   | 0       | 0      | 3.4029 | 3.8893 | 0       | 0 |
| Transitional endoplasmic reticulum ATPase                           | TERA_MOUSE            | 89 kDa   | 0       | 1.0998 | 0      | 0      | 0.76034 | 0 |
| Neurobeachin                                                        | NBEA_MOUSE            | 327 kDa  | 0       | 0      | 1.1343 | 0      | 0       | 0 |
| Ig-like domain-containing protein                                   | A0A075B677_MOUSE      | 10 kDa   | 5.8451  | 2.1997 | 3.4029 | 1.2964 | 0       | 0 |
| Pericentrin                                                         | PCNT_MOUSE            | 329 kDa  | 0       | 0      | 0      | 0      | 0.76034 | 0 |
| Polycystic kidney disease protein 1-like 1                          | PK1L1_MOUSE           | 291 kDa  | 0       | 1.0998 | 0      | 0      | 0       | 0 |
| Ig-like domain-containing protein                                   | A0A140T8P9_MOUSE (+2) | 13 kDa   | 1.9484  | 1.0998 | 1.1343 | 5.1857 | 0       | 0 |
| Keratin, type I cytoskeletal 28                                     | K1C28_MOUSE           | 50 kDa   | 0.97418 | 5.4992 | 1.1343 | 3.8893 | 0       | 0 |
| Rab-like protein 6                                                  | RABL6_MOUSE           | 80 kDa   | 0       | 0      | 1.1343 | 0      | 0       | 0 |
| Dynein, axonemal, heavy chain 9                                     | B1AR51_MOUSE          | 512 kDa  | 0.97418 | 0      | 0      | 0      | 0       | 0 |
| Lipoxygenase homology domain-containing protein 1                   | LOXH1_MOUSE           | 236 kDa  | 0       | 1.0998 | 0      | 0      | 0       | 0 |
| Mannose-binding protein A                                           | MBL1_MOUSE            | 25 kDa   | 1.9484  | 1.0998 | 1.1343 | 1.2964 | 1.5207  | 0 |
| Cytochrome P450 1A2                                                 | CP1A2_MOUSE           | 58 kDa   | 0.97418 | 0      | 1.1343 | 0      | 0.76034 | 0 |
| Apolipoprotein C-II                                                 | APOC2_MOUSE           | 11 kDa   | 0       | 0      | 1.1343 | 1.2964 | 1.5207  | 0 |
| Midasin                                                             | A2ANY6_MOUSE          | 630 kDa  | 0.97418 | 0      | 0      | 0      | 0.76034 | 0 |
| Predicted gene 597                                                  | E9QJ5_MOUSE           | 100 kDa  | 0       | 0      | 0      | 1.2964 | 0       | 0 |
| Endoplasmic reticulum metalloproteinase 1                           | ERMP1_MOUSE           | 100 kDa  | 0       | 0      | 0      | 0      | 0.76034 | 0 |
| Cluster of Alpha-amylase 1                                          | AMY1_MOUSE [2]        | 58 kDa   | 0.97418 | 2.1997 | 0      | 1.2964 | 0       | 0 |
| Alpha-amylase 1                                                     | AMY1_MOUSE            | 58 kDa   | 0.97418 | 2.1997 | 0      | 1.2964 | 0       | 0 |
| Pancreatic alpha-amylase                                            | AMP_MOUSE             | 57 kDa   | 0       | 0      | 0      | 0      | 0       | 0 |
| Cluster of Sal-like protein 1                                       | SALL1_MOUSE [2]       | 140 kDa  | 0       | 0      | 0      | 0      | 0.76034 | 0 |
| Sal-like protein 1                                                  | SALL1_MOUSE           | 140 kDa  | 0       | 0      | 0      | 0      | 0.76034 | 0 |
| Sal-like protein 3                                                  | SALL3_MOUSE           | 139 kDa  | 0       | 0      | 0      | 0      | 0.76034 | 0 |
| Extracellular matrix protein 1                                      | ECM1_MOUSE            | 63 kDa   | 0       | 0      | 3.4029 | 1.2964 | 0       | 0 |
| Cofilin-1                                                           | COF1_MOUSE            | 19 kDa   | 0       | 0      | 3.4029 | 2.5928 | 0.76034 | 0 |
| Thioredoxin                                                         | THIO_MOUSE            | 12 kDa   | 0.97418 | 1.0998 | 3.4029 | 3.8893 | 0       | 0 |
| Pyruvate kinase PKM                                                 | KPYM_MOUSE            | 58 kDa   | 0       | 2.1997 | 1.1343 | 0      | 0       | 0 |
| Proliferation marker protein Ki-67                                  | Ki67_MOUSE            | 351 kDa  | 0.97418 | 0      | 0      | 0      | 0       | 0 |
| E3 ubiquitin-protein ligase RNF146                                  | RNF146_MOUSE          | 39 kDa   | 0       | 0      | 0      | 0      | 0.76034 | 0 |
| Coiled-coil domain-containing protein 150                           | CC150_MOUSE           | 129 kDa  | 0.97418 | 0      | 0      | 0      | 0       | 0 |
| AP2-interacting clathrin-endocytosis protein                        | K1107_MOUSE           | 134 kDa  | 0       | 0      | 1.1343 | 0      | 0       | 0 |
| Intraflagellar transport protein 172 homolog                        | IF172_MOUSE           | 198 kDa  | 0       | 0      | 1.1343 | 0      | 0       | 0 |
| 14-3-3 protein gamma                                                | 1433G_MOUSE           | 28 kDa   | 0       | 0      | 0      | 0      | 0       | 0 |
| 14-3-3 protein epsilon                                              | 1433E_MOUSE           | 29 kDa   | 0       | 0      | 0      | 0      | 0       | 0 |
| 14-3-3 protein theta                                                | 1433T_MOUSE           | 28 kDa   | 0       | 0      | 0      | 0      | 0       | 0 |
| Cluster of Alpha-actinin-1                                          | ACTN1_MOUSE [2]       | 103 kDa  | 0       | 0      | 0      | 0      | 1.5207  | 0 |
| Alpha-actinin-1                                                     | ACTN1_MOUSE           | 103 kDa  | 0       | 0      | 0      | 0      | 1.5207  | 0 |
| Alpha-actinin-4                                                     | ACTN4_MOUSE           | 105 kDa  | 0       | 0      | 0      | 0      | 1.5207  | 0 |
| C-reactive protein                                                  | CRP_MOUSE             | 25 kDa   | 0.97418 | 2.1997 | 1.1343 | 1.2964 | 0       | 0 |
| Histone-lysine N-methyltransferase 2D                               | KMT2D_MOUSE           | 600 kDa  | 0       | 0      | 1.1343 | 1.2964 | 0       | 0 |
| Pleckstrin homology domain-containing family A member 6             | PKHA6_MOUSE           | 131 kDa  | 0       | 0      | 0      | 1.2964 | 0.76034 | 0 |
| Cluster of Protocadherin alpha 11                                   | Q91Y19_MOUSE [5]      | 103 kDa  | 0       | 0      | 0      | 2.5928 | 0       | 0 |
| Protocadherin alpha 11                                              | Q91Y19_MOUSE          | 103 kDa  | 0       | 0      | 0      | 2.5928 | 0       | 0 |
| Protocadherin alpha-10                                              | PCDAA_MOUSE           | 102 kDa  | 0       | 0      | 0      | 2.5928 | 0       | 0 |
| Protocadherin alpha-9                                               | PCDA9_MOUSE           | 107 kDa  | 0       | 0      | 0      | 2.5928 | 0       | 0 |
| Protocadherin alpha 5                                               | Q91Y15_MOUSE          | 102 kDa  | 0       | 0      | 0      | 0      | 0       | 0 |
| Protocadherin alpha-7                                               | PCDA7_MOUSE           | 101 kDa  | 0       | 0      | 0      | 0      | 0       | 0 |
| Ig-like domain-containing protein                                   | A0A075B5S2_MOUSE      | 14 kDa   | 2.9225  | 1.0998 | 1.1343 | 1.2964 | 0       | 0 |
| Ig-like domain-containing protein                                   | A0A075B5R0_MOUSE      | 13 kDa   | 1.9484  | 3.2995 | 0      | 1.2964 | 0       | 0 |
| Protein unc-45 homolog B                                            | UN45B_MOUSE           | 104 kDa  | 0       | 0      | 0      | 0      | 0.76034 | 0 |
| TRIO and F-actin-binding protein                                    | TARA_MOUSE            | 223 kDa  | 0       | 0      | 0      | 0      | 0.76034 | 0 |
| Disco-interacting protein 2 homolog B                               | DIP2B_MOUSE           | 171 kDa  | 0       | 0      | 0      | 0      | 0.76034 | 0 |
| Ig-like domain-containing protein                                   | A0A075B5J9_MOUSE (+1) | 12 kDa   | 0.97418 | 2.1997 | 0      | 1.2964 | 0       | 0 |
| Max-like protein X                                                  | MLX_MOUSE             | 33 kDa   | 0       | 0      | 0      | 1.2964 | 0       | 0 |
| Fatty acid-binding protein, adipocyte                               | FABP4_MOUSE           | 15 kDa   | 0       | 0      | 1.1343 | 0      | 0       | 0 |
| Protein turtle homolog A                                            | TUTLA_MOUSE           | 127 kDa  | 0.97418 | 0      | 0      | 0      | 0       | 0 |
| DNA topoisomerase 2-alpha                                           | TOP2A_MOUSE           | 173 kDa  | 0       | 0      | 0      | 0      | 0.76034 | 0 |
| C2 domain-containing protein                                        | A0A286YDU8_MOUSE      | 162 kDa  | 0.97418 | 0      | 0      | 0      | 0       | 0 |
| Tyrosine-tRNA ligase, mitochondrial                                 | SYTM_MOUSE            | 53 kDa   | 0.97418 | 0      | 0      | 0      | 0       | 0 |
| Endoplasmic reticulum chaperone BiP                                 | BIP_MOUSE             | 72 kDa   | 0       | 0      | 3.4029 | 1.2964 | 0.76034 | 0 |
| Ras-related C3 botulinum toxin substrate 1                          | RAC1_MOUSE            | 21 kDa   | 0       | 0      | 2.2686 | 1.2964 | 0       | 0 |
| Ras-related protein Rap-1b                                          | RAP1B_MOUSE           | 21 kDa   | 0       | 0      | 2.2686 | 3.8893 | 0       | 0 |
| Myosin light polypeptide 6                                          | MYL6_MOUSE            | 17 kDa   | 0       | 1.0998 | 2.2686 | 2.5928 | 0.76034 | 0 |
| Complement C1q subcomponent subunit B                               | C1QB_MOUSE            | 27 kDa   | 0.97418 | 2.1997 | 1.1343 | 1.2964 | 0       | 0 |
| Hormone-sensitive lipase                                            | LIP5_MOUSE            | 83 kDa   | 0.97418 | 0      | 0      | 0      | 0.76034 | 0 |
| Peptidase inhibitor 16                                              | PI16_MOUSE            | 54 kDa   | 0.97418 | 0      | 1.1343 | 0      | 0       | 0 |
| Adenylate cyclase type 3                                            | ADCY3_MOUSE           | 129 kDa  | 0.97418 | 1.0998 | 0      | 0      | 0       | 0 |
| Immunoglobulin superfamily containing leucine-rich repeat protein 2 | ISLR2_MOUSE           | 80 kDa   | 0       | 1.0998 | 0      | 0      | 0       | 0 |
| Vinculin                                                            | VINC_MOUSE            | 117 kDa  | 0       | 1.0998 | 1.1343 | 1.2964 | 0       | 0 |
| Protein convertase subtilisin/kexin type 5                          | PCSK5_MOUSE           | 209 kDa  | 0       | 0      | 3.4029 | 1.2964 | 0       | 0 |
| ELKS/Rab6-interacting/CAST family member 1                          | RBG12_MOUSE           | 128 kDa  | 0.97418 | 0      | 0      | 0      | 0       | 0 |
| Optineurin                                                          | OPTN_MOUSE            | 67 kDa   | 0       | 0      | 0      | 1.2964 | 0       | 0 |
| Ropporin-1-like protein                                             | ROP1L_MOUSE           | 25 kDa   | 0.97418 | 1.0998 | 0      | 0      | 0       | 0 |
| Rab GDP dissociation inhibitor alpha                                | GDIA_MOUSE            | 51 kDa   | 0       | 0      | 0      | 0      | 0.76034 | 0 |
| Cluster of Retinal dehydrogenase 1                                  | AL1A1_MOUSE [2]       | 54 kDa   | 0       | 0      | 1.1343 | 0      | 1.5207  | 0 |
| Retinal dehydrogenase 1                                             | AL1A1_MOUSE           | 54 kDa   | 0       | 0      | 1.1343 | 0      | 1.5207  | 0 |
| Aldehyde dehydrogenase, cytosolic 1                                 | AL1A7_MOUSE           | 55 kDa   | 0       | 0      | 0      | 0      | 0       | 0 |
| Fermitin family homolog 3                                           | URP2_MOUSE            | 76 kDa   | 0       | 0      | 2.2686 | 1.2964 | 1.5207  | 0 |
| Superoxide dismutase [Cu-Zn]                                        | SODC_MOUSE            | 16 kDa   | 1.9484  | 1.0998 | 0      | 0      | 0       | 0 |
| Peroxioredoxin-6                                                    | PRDX6_MOUSE           | 25 kDa   | 0       | 0      | 1.1343 | 1.2964 | 0       | 0 |
| Suprabasin                                                          | SBSN_MOUSE            | 72 kDa   | 0       | 0      | 1.1343 | 0      | 0       | 0 |



|                                                                |                       |         |         |        |        |        |         |   |
|----------------------------------------------------------------|-----------------------|---------|---------|--------|--------|--------|---------|---|
| Cystatin domain-containing protein                             | Q9D181_MOUSE          | 17 kDa  | 0       | 0      | 0      | 1.2964 | 0       | 0 |
| Protein CTLA-2-alpha                                           | CTL2A_MOUSE           | 16 kDa  | 0       | 0      | 1.1343 | 0      | 0       | 0 |
| Ig-like domain-containing protein                              | A0A140T8P3_MOUSE      | 13 kDa  | 1.9484  | 1.0998 | 1.1343 | 1.2964 | 0       | 0 |
| Ig-like domain-containing protein                              | A0A075B5T5_MOUSE      | 11 kDa  | 0       | 2.1997 | 0      | 3.8893 | 0       | 0 |
| AT-rich interactive domain-containing protein 1A               | ARI1A_MOUSE           | 242 kDa | 0       | 1.0998 | 0      | 0      | 0.76034 | 0 |
| Cholinesterase                                                 | CHLE_MOUSE            | 68 kDa  | 0       | 1.0998 | 0      | 0      | 0       | 0 |
| Protein BHLHB9                                                 | BHLH9_MOUSE           | 60 kDa  | 0       | 0      | 0      | 1.2964 | 0       | 0 |
| Dual specificity tyrosine-phosphorylation-regulated kinase 2   | DYRK2_MOUSE           | 67 kDa  | 0       | 1.0998 | 0      | 0      | 0       | 0 |
| Lysosomal-trafficking regulator                                | LYST_MOUSE            | 425 kDa | 0       | 1.0998 | 0      | 0      | 0       | 0 |
| G_PROTEIN_RECEP_F3_4 domain-containing protein                 | H3BK37_MOUSE          | 98 kDa  | 0.97418 | 0      | 0      | 0      | 0       | 0 |
| Choline-phosphate cytidyltransferase A                         | PCY1A_MOUSE           | 42 kDa  | 0       | 0      | 1.1343 | 1.2964 | 0       | 0 |
| Filamin A-interacting protein 1-like                           | FIL1L_MOUSE           | 130 kDa | 0       | 0      | 1.1343 | 0      | 0       | 0 |
| Polymeric immunoglobulin receptor                              | PIGR_MOUSE            | 85 kDa  | 0       | 0      | 0      | 0      | 0.76034 | 0 |
| Diacylglycerol kinase                                          | D3YWQ0_MOUSE          | 118 kDa | 0.97418 | 0      | 0      | 0      | 0       | 0 |
| Adenylate cyclase type 10                                      | ADCYA_MOUSE           | 186 kDa | 0       | 0      | 1.1343 | 0      | 0       | 0 |
| Cluster of Fructose-bisphosphate aldolase                      | A6Z147_MOUSE [2]      | 39 kDa  | 0       | 0      | 1.1343 | 1.2964 | 0       | 0 |
| Fructose-bisphosphate aldolase                                 | A6Z147_MOUSE          | 39 kDa  | 0       | 0      | 1.1343 | 1.2964 | 0       | 0 |
| Fructose-bisphosphate aldolase A                               | ALDOA_MOUSE           | 39 kDa  | 0       | 0      | 1.1343 | 1.2964 | 0       | 0 |
| Cluster of GTP-binding nuclear protein Ran                     | RAN_MOUSE [2]         | 24 kDa  | 0       | 0      | 1.1343 | 0      | 0       | 0 |
| GTP-binding nuclear protein Ran                                | RAN_MOUSE             | 24 kDa  | 0       | 0      | 1.1343 | 0      | 0       | 0 |
| GTP-binding nuclear protein Ran                                | Q14AA6_MOUSE          | 24 kDa  | 0       | 0      | 1.1343 | 0      | 0       | 0 |
| Cathelicidin antimicrobial peptide                             | CAMP_MOUSE            | 19 kDa  | 0       | 0      | 2.2686 | 1.2964 | 0       | 0 |
| Complement C1q subcomponent subunit C                          | C1QC_MOUSE            | 26 kDa  | 0       | 0      | 2.2686 | 1.2964 | 0       | 0 |
| Perioestin                                                     | POSTN_MOUSE           | 93 kDa  | 0       | 0      | 2.2686 | 0      | 0       | 0 |
| Protein 4.1                                                    | 41_MOUSE              | 96 kDa  | 0       | 0      | 2.2686 | 1.2964 | 0       | 0 |
| Protein RUFY3                                                  | RUFY3_MOUSE           | 53 kDa  | 0       | 0      | 0      | 0      | 0.76034 | 0 |
| Nucleosome assembly protein 1-like 3                           | NP1L3_MOUSE           | 61 kDa  | 0       | 0      | 0      | 1.2964 | 0       | 0 |
| NAC-alpha domain-containing protein 1                          | NACAD_MOUSE           | 157 kDa | 0       | 0      | 0      | 1.2964 | 0       | 0 |
| Glutathione peroxidase 1                                       | GPX1_MOUSE            | 22 kDa  | 0       | 0      | 1.1343 | 1.2964 | 0.76034 | 0 |
| Transgelin-2                                                   | TAGL2_MOUSE           | 22 kDa  | 0       | 0      | 1.1343 | 1.2964 | 0       | 0 |
| Breast cancer anti-estrogen resistance protein 1               | BCAR1_MOUSE           | 94 kDa  | 0       | 0      | 0      | 0      | 0.76034 | 0 |
| Myosin-binding protein C, slow-type                            | A0A5718EN1_MOUSE      | 128 kDa | 0       | 0      | 0      | 1.2964 | 0       | 0 |
| Proprotein convertase subtilisin/kexin type 7                  | PCSK7_MOUSE           | 84 kDa  | 0.97418 | 0      | 0      | 0      | 0       | 0 |
| Lipid droplet-associated hydrolase                             | LDAH_MOUSE            | 37 kDa  | 0       | 1.0998 | 0      | 0      | 0       | 0 |
| Disintegrin and metalloproteinase domain-containing protein 28 | ADA28_MOUSE           | 89 kDa  | 0       | 0      | 1.1343 | 1.2964 | 0       | 0 |
| TGF-beta-activated kinase 1 and MAP3K7-binding protein 2       | TAB2_MOUSE            | 76 kDa  | 0.97418 | 0      | 0      | 0      | 0       | 0 |
| Zinc finger CCH type-containing 7 A                            | E9PWW6_MOUSE          | 111 kDa | 0       | 0      | 1.1343 | 0      | 0       | 0 |
| Myosin-7B                                                      | MYH7B_MOUSE           | 222 kDa | 0       | 0      | 0      | 0      | 0.76034 | 0 |
| Hepatocyte growth factor receptor                              | MET_MOUSE             | 154 kDa | 0       | 0      | 0      | 0      | 0.76034 | 0 |
| Ig-like domain-containing protein                              | A0A075B5P0_MOUSE      | 13 kDa  | 0       | 0      | 0      | 0      | 0       | 0 |
| Cluster of Ig-like domain-containing protein                   | A0A075B5S9_MOUSE [2]  | 11 kDa  | 0.97418 | 1.0998 | 0      | 0      | 0       | 0 |
| Ig-like domain-containing protein                              | A0A075B5S9_MOUSE      | 11 kDa  | 0.97418 | 1.0998 | 0      | 0      | 0       | 0 |
| Ig-like domain-containing protein                              | A0A084J1J4_MOUSE      | 13 kDa  | 0.97418 | 1.0998 | 0      | 0      | 0       | 0 |
| EGF-containing fibulin-like extracellular matrix protein 1     | FBLN3_MOUSE           | 55 kDa  | 0       | 0      | 3.4029 | 0      | 0       | 0 |
| Creatine kinase M-type                                         | KCRM_MOUSE            | 43 kDa  | 0       | 0      | 2.2686 | 0      | 0       | 0 |
| Ig-like domain-containing protein                              | A0A075B5Y1_MOUSE (+1) | 13 kDa  | 0.97418 | 1.0998 | 0      | 0      | 0       | 0 |
| Ran-specific GTPase-activating protein                         | RANG_MOUSE            | 24 kDa  | 0       | 0      | 1.1343 | 0      | 0       | 0 |
| Ig-like domain-containing protein                              | A0A075B5M1_MOUSE      | 10 kDa  | 0       | 1.0998 | 0      | 2.5928 | 0       | 0 |
| Ig-like domain-containing protein                              | A0A075B5U1_MOUSE      | 11 kDa  | 0       | 1.0998 | 0      | 1.2964 | 0       | 0 |
| Ig-like domain-containing protein                              | A0A140T8M6_MOUSE (+1) | 13 kDa  | 0       | 1.0998 | 1.1343 | 1.2964 | 0       | 0 |
| Histidine triad nucleotide-binding protein 1                   | HINT1_MOUSE           | 14 kDa  | 0       | 0      | 1.1343 | 1.2964 | 0       | 0 |
| 55 kDa erythrocyte membrane protein                            | EM55_MOUSE            | 52 kDa  | 0       | 0      | 1.1343 | 0      | 0.76034 | 0 |
| Coagulation factor XIII A chain                                | F13A_MOUSE            | 83 kDa  | 0       | 0      | 0      | 0      | 0.76034 | 0 |
| Lactylglutathione lyase                                        | LGUL_MOUSE            | 21 kDa  | 0       | 0      | 0      | 0      | 0.76034 | 0 |
| Cytochrome c, somatic                                          | CYC_MOUSE             | 12 kDa  | 0.97418 | 0      | 0      | 0      | 0       | 0 |
| Bisphosphoglycerate mutase                                     | PMGE_MOUSE            | 30 kDa  | 0.97418 | 0      | 0      | 0      | 1.5207  | 0 |
| Placenta-specific protein 9                                    | PLAC9_MOUSE           | 11 kDa  | 0       | 1.0998 | 0      | 0      | 0       | 0 |
| IRG-type G domain-containing protein                           | Q3UED7_MOUSE          | 47 kDa  | 0       | 0      | 0      | 0      | 0.76034 | 0 |
| Nucleolar RNA helicase 2                                       | DDX21_MOUSE           | 94 kDa  | 0.97418 | 0      | 0      | 0      | 0       | 0 |
| Keratin, type I cytoskeletal 26                                | K1C26_MOUSE           | 51 kDa  | 0       | 0      | 0      | 1.2964 | 0       | 0 |
| G_PROTEIN_RECEP_F3_4 domain-containing protein                 | E9Q2U5_MOUSE          | 98 kDa  | 0       | 0      | 1.1343 | 0      | 1.5207  | 0 |
| Profilin-1                                                     | PROF1_MOUSE           | 15 kDa  | 0       | 1.0998 | 1.1343 | 1.2964 | 0       | 0 |
| Ubiquitin-like modifier-activating enzyme 1                    | UBA1_MOUSE            | 118 kDa | 0       | 0      | 0      | 0      | 0.76034 | 0 |
| Exosome complex exonuclease RRP44                              | RRP44_MOUSE           | 109 kDa | 0       | 1.0998 | 0      | 0      | 0       | 0 |
| Translocation protein SEC63 homolog                            | SEC63_MOUSE           | 88 kDa  | 0       | 1.0998 | 0      | 0      | 0       | 0 |
| Centromere protein L                                           | CENPL_MOUSE           | 38 kDa  | 0       | 0      | 0      | 1.2964 | 0       | 0 |
| Microtubule-associated protein 2                               | MTAP2_MOUSE           | 199 kDa | 0       | 0      | 0      | 1.2964 | 0       | 0 |
| Collagen alpha-1(X) chain                                      | COBA1_MOUSE           | 181 kDa | 0       | 0      | 1.1343 | 0      | 0       | 0 |
| Ig-like domain-containing protein                              | A0A075B5Q6_MOUSE      | 13 kDa  | 0       | 2.1997 | 0      | 0      | 0       | 0 |
| Basigin                                                        | BASL_MOUSE            | 42 kDa  | 0       | 0      | 2.2686 | 0      | 0       | 0 |
| Erythrocyte band 7 integral membrane protein                   | STOM_MOUSE            | 31 kDa  | 0       | 0      | 1.1343 | 0      | 0       | 0 |
| Ig-like domain-containing protein                              | A0A075B697_MOUSE (+2) | 12 kDa  | 0       | 1.0998 | 0      | 0      | 0       | 0 |
| Thrombospondin-4                                               | TSP4_MOUSE            | 106 kDa | 0       | 0      | 2.2686 | 0      | 0       | 0 |
| Complement C1q subcomponent subunit A                          | C1QA_MOUSE            | 26 kDa  | 0.97418 | 0      | 0      | 0      | 0.76034 | 0 |
| Ig-like domain-containing protein                              | A0A075B5N9_MOUSE (+1) | 11 kDa  | 0       | 1.0998 | 0      | 1.2964 | 0       | 0 |
| Protein sel-1 homolog 2                                        | SEL12_MOUSE           | 78 kDa  | 0.97418 | 0      | 0      | 0      | 0       | 0 |
| Nucleobindin-1                                                 | NUCB1_MOUSE           | 53 kDa  | 0       | 0      | 1.1343 | 0      | 0       | 0 |
| Transcription factor SOX-9                                     | SOX9_MOUSE            | 56 kDa  | 0       | 0      | 0      | 0      | 0.76034 | 0 |
| Zinc finger protein 418                                        | Q8BF58_MOUSE          | 75 kDa  | 0       | 0      | 1.1343 | 0      | 0       | 0 |
| Protein SFI1 homolog                                           | SFI1_MOUSE            | 144 kDa | 0.97418 | 0      | 0      | 0      | 0       | 0 |
| Liprin-alpha-3                                                 | LIPA3_MOUSE           | 133 kDa | 0       | 1.0998 | 0      | 0      | 0       | 0 |
| Cadherin-5                                                     | CADH5_MOUSE           | 88 kDa  | 0       | 0      | 1.1343 | 0      | 0       | 0 |
| PDZ and LIM domain protein 1                                   | PDL1_MOUSE            | 36 kDa  | 0       | 0      | 0      | 1.2964 | 0       | 0 |
| Unconventional myosin-XIX                                      | MYO19_MOUSE           | 108 kDa | 0       | 0      | 1.1343 | 0      | 0       | 0 |
| Ig-like domain-containing protein                              | A0A0AGYXQ0_MOUSE      | 13 kDa  | 0       | 1.0998 | 0      | 0      | 0       | 0 |
| Predicted gene 13084                                           | A2A8N0_MOUSE (+1)     | 57 kDa  | 0       | 1.0998 | 0      | 0      | 0       | 0 |
| Ig heavy chain V region                                        | HVM00_MOUSE           | 13 kDa  | 0       | 1.0998 | 0      | 0      | 0       | 0 |
| Ig kappa chain V-V region MOPC 41                              | KVSA7_MOUSE           | 14 kDa  | 0       | 1.0998 | 0      | 0      | 0       | 0 |
| Apolipoprotein A-V                                             | APOA5_MOUSE           | 41 kDa  | 0       | 0      | 0      | 1.2964 | 0       | 0 |
| Glycosylation-dependent cell adhesion molecule 1               | GLCM1_MOUSE           | 16 kDa  | 0       | 0      | 1.1343 | 0      | 0       | 0 |
| tRNA (N(3)-methylcytidine methyltransferase METTL6             | METL6_MOUSE           | 33 kDa  | 0       | 0      | 1.1343 | 0      | 0       | 0 |
| Monocarboxylate transporter 1                                  | MOT1_MOUSE            | 53 kDa  | 0       | 0      | 1.1343 | 0      | 0       | 0 |
| Proteasome subunit alpha type-6                                | PSA6_MOUSE            | 27 kDa  | 0       | 0      | 0      | 0      | 0.76034 | 0 |
| BTB domain-containing protein                                  | B81KF6_MOUSE          | 58 kDa  | 0       | 1.0998 | 0      | 0      | 0       | 0 |
| Plastin-2                                                      | PLSL_MOUSE            | 70 kDa  | 0       | 0      | 0      | 0      | 0.76034 | 0 |
| Calponin-2                                                     | CNN2_MOUSE            | 33 kDa  | 0       | 0      | 0      | 1.2964 | 0       | 0 |
| Proteasome subunit beta type-2                                 | PSB2_MOUSE            | 23 kDa  | 0       | 0      | 0      | 0      | 0.76034 | 0 |
| Metalloproteinase inhibitor 3                                  | TIMP3_MOUSE           | 24 kDa  | 0       | 0      | 0      | 0      | 0.76034 | 0 |
| Submaxillary gland androgen-regulated protein 3A               | SMR3A_MOUSE           | 16 kDa  | 0       | 0      | 0      | 1.2964 | 0       | 0 |
| Coenzyme Q-binding protein COQ10 homolog 8, mitochondrial      | CQ108_MOUSE           | 27 kDa  | 0       | 0      | 0      | 1.2964 | 0       | 0 |
| Armaddillo repeat-containing X-linked protein 3                | ARMX3_MOUSE           | 43 kDa  | 0       | 0      | 0      | 0      | 0.76034 | 0 |
| Ig-like domain-containing protein                              | A0A075B5V8_MOUSE      | 11 kDa  | 0       | 0      | 1.1343 | 0      | 0       | 0 |
| T-complex protein 1 subunit zeta                               | TCPZ_MOUSE            | 58 kDa  | 0       | 1.0998 | 0      | 0      | 0       | 0 |
| NACHT, LRR and PYD domains-containing protein 5                | NALP5_MOUSE           | 131 kDa | 0       | 0      | 1.1343 | 0      | 0       | 0 |
